# Supplementary material for: Cell-Main Spectra Profile Screening Technique in Simulation of Circulating Tumour Cells Using MALDI-TOF Mass Spectrometry
Source: Preprints.org preprint supplement (doi:10.20944/preprints202106.0506.v1), 2021-06-21

S1A

# RBC pattern

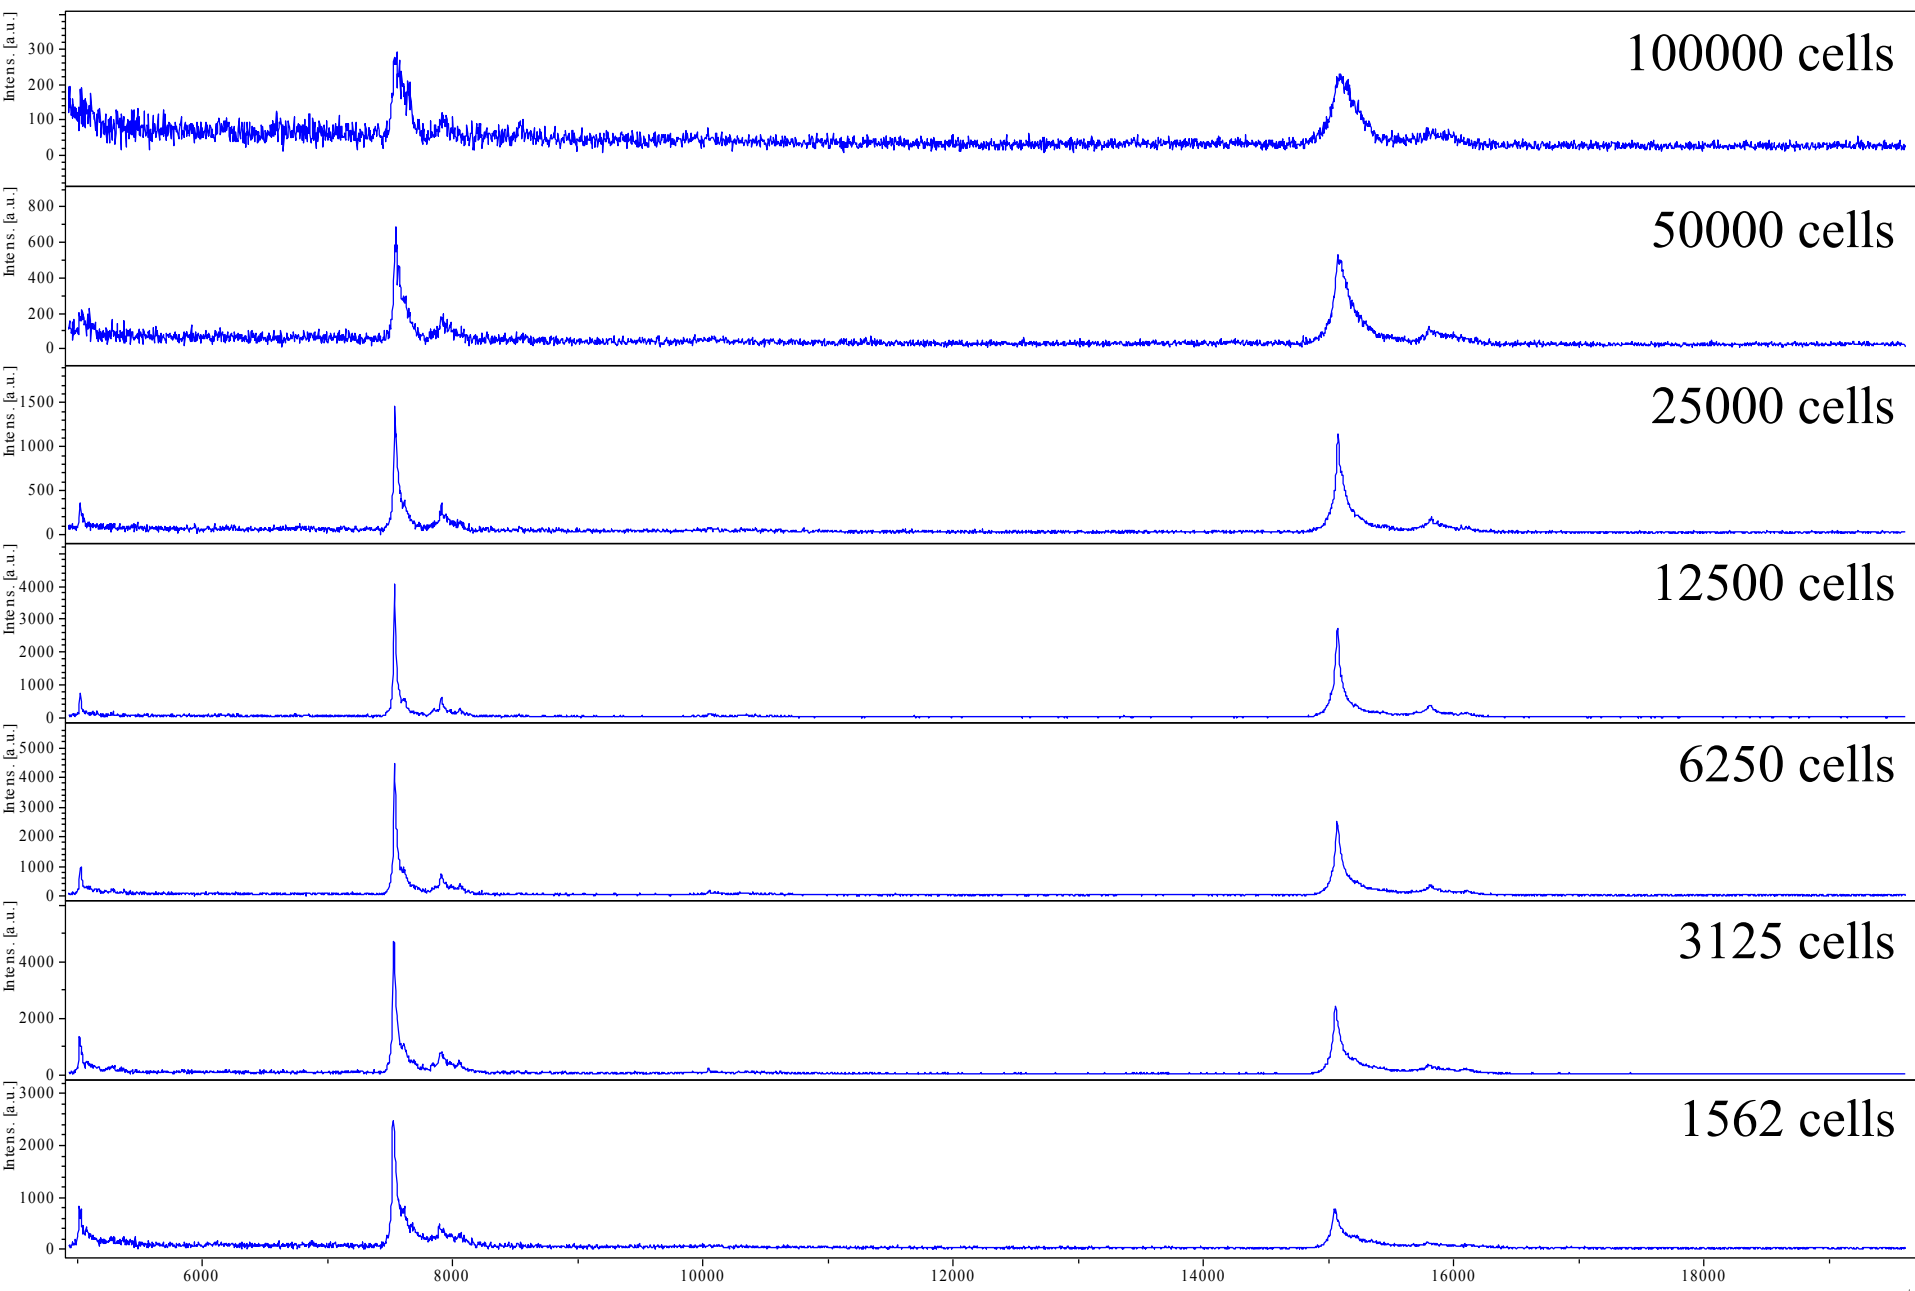

# S1B WBC pattern

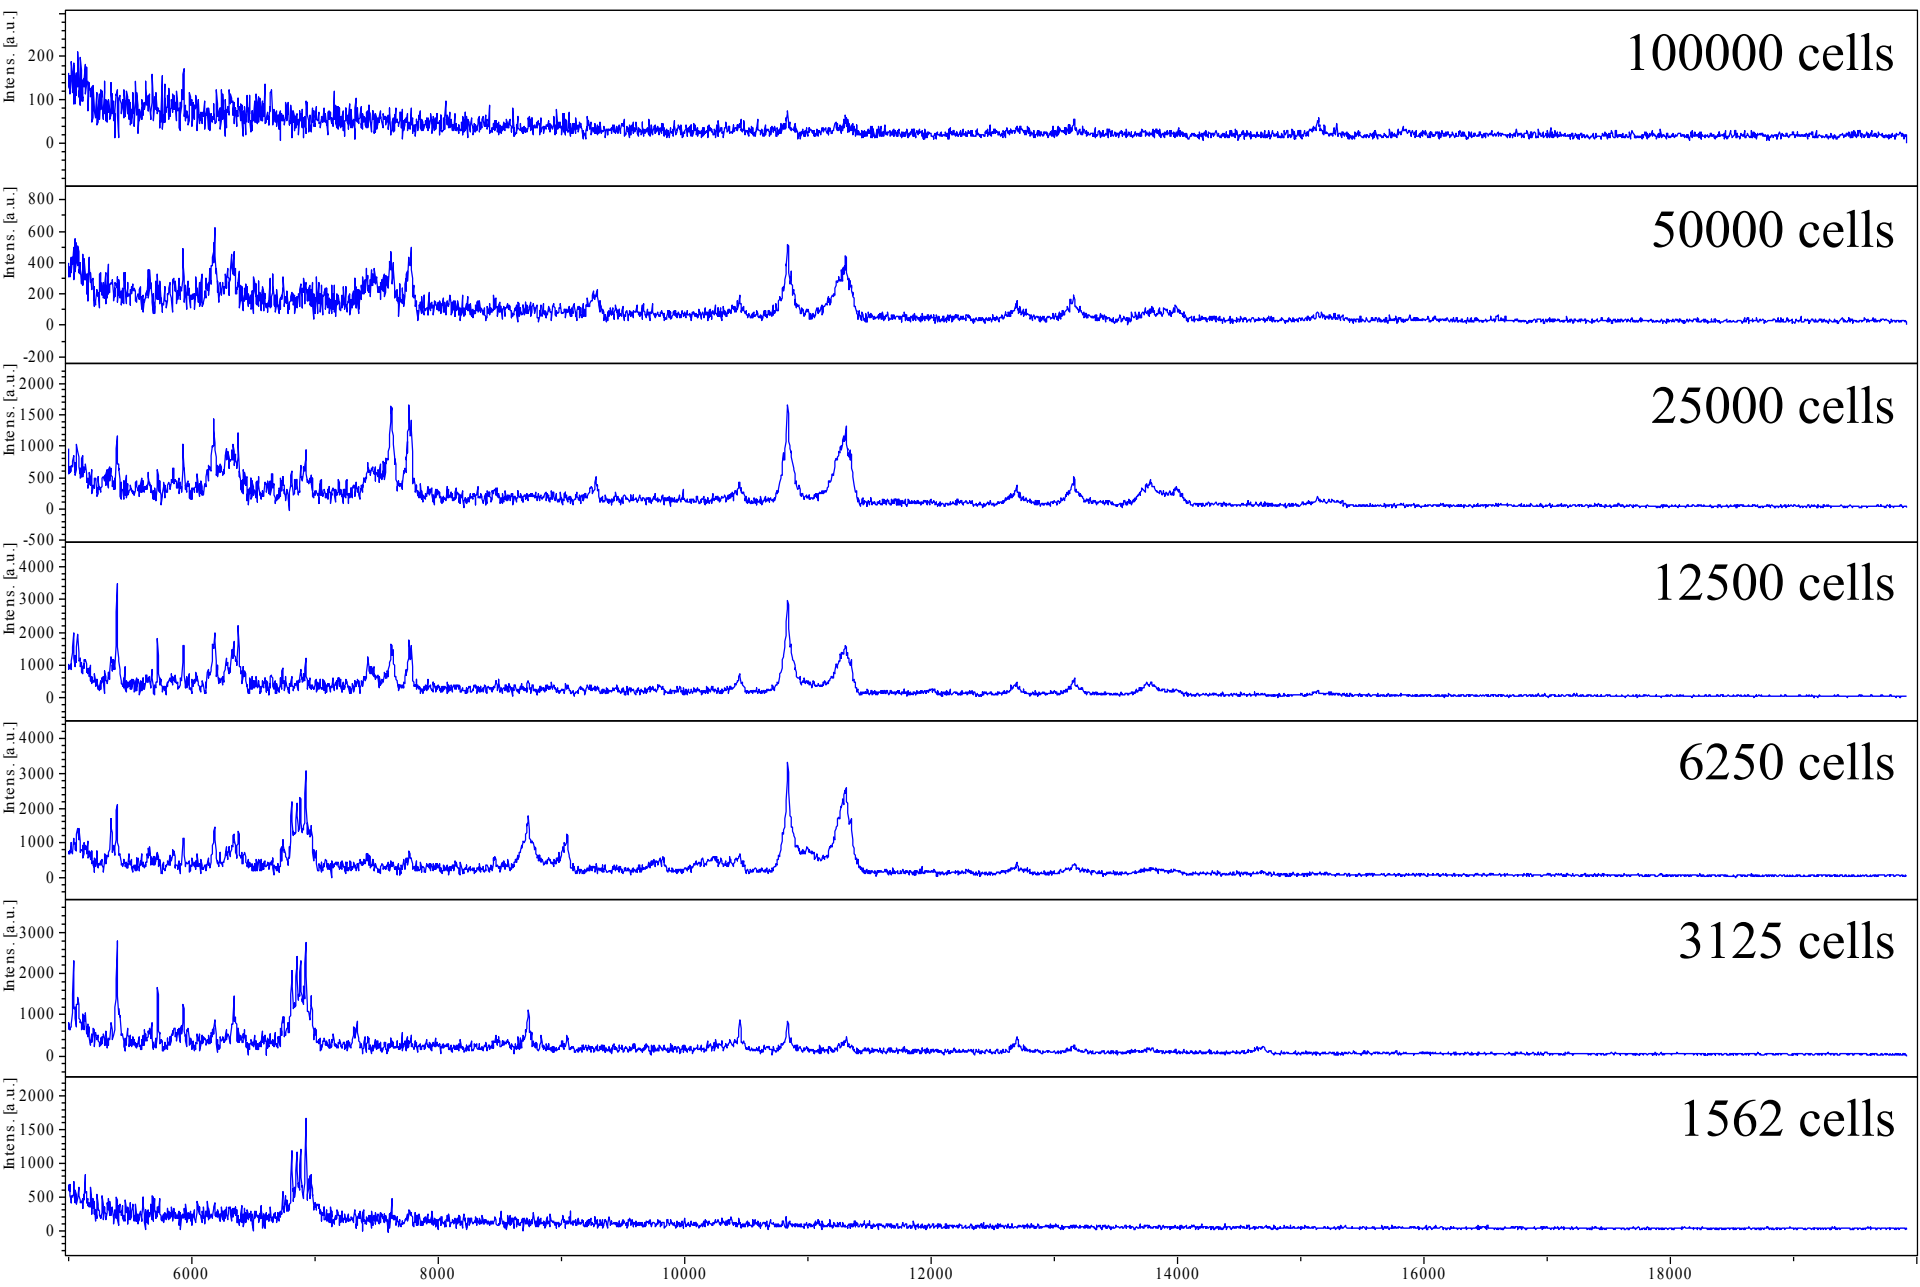

# S1C PBMC pattern

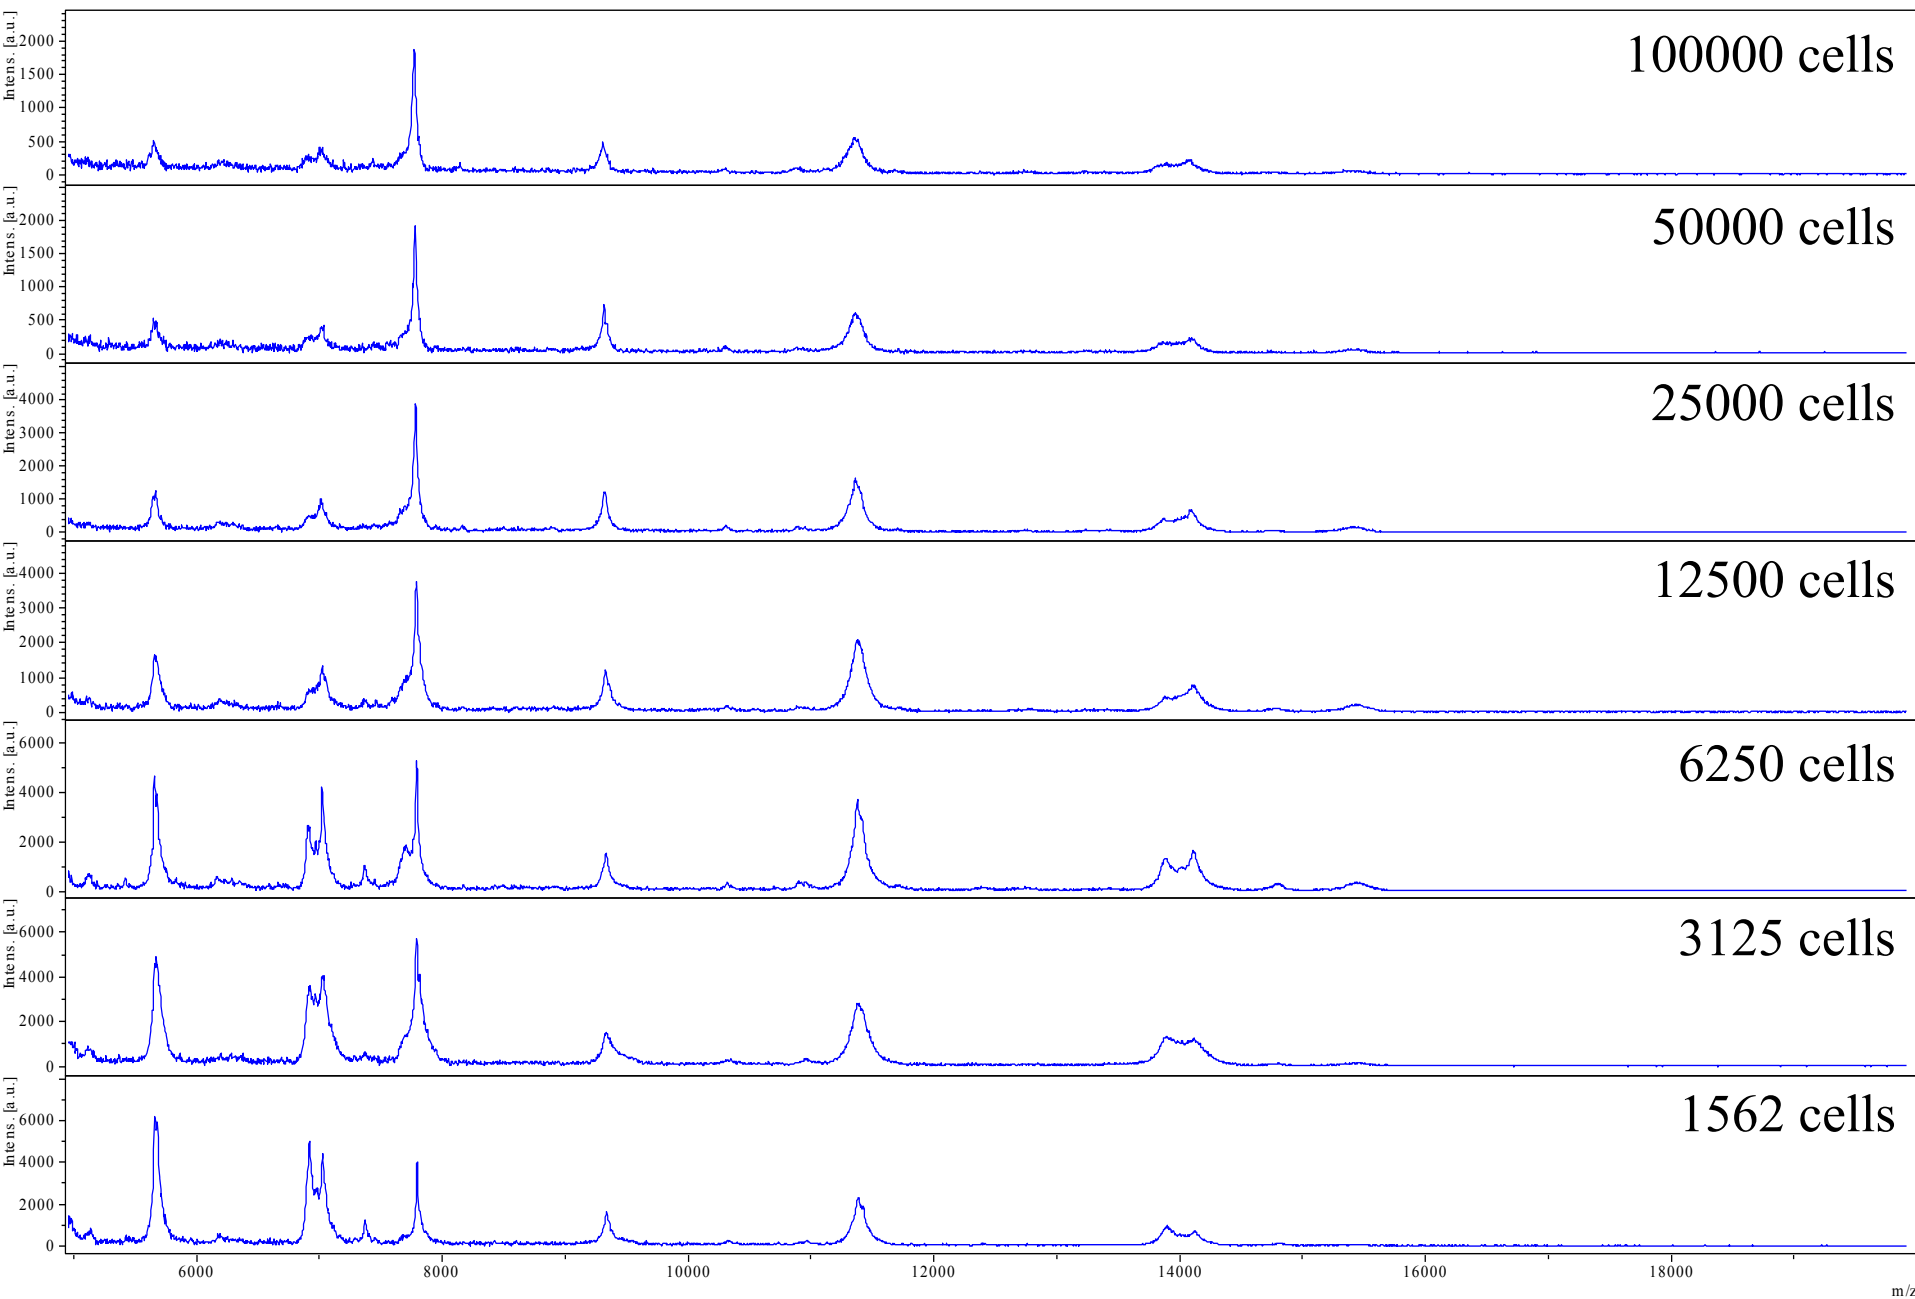

S1D

# PHA activated T cell pattern

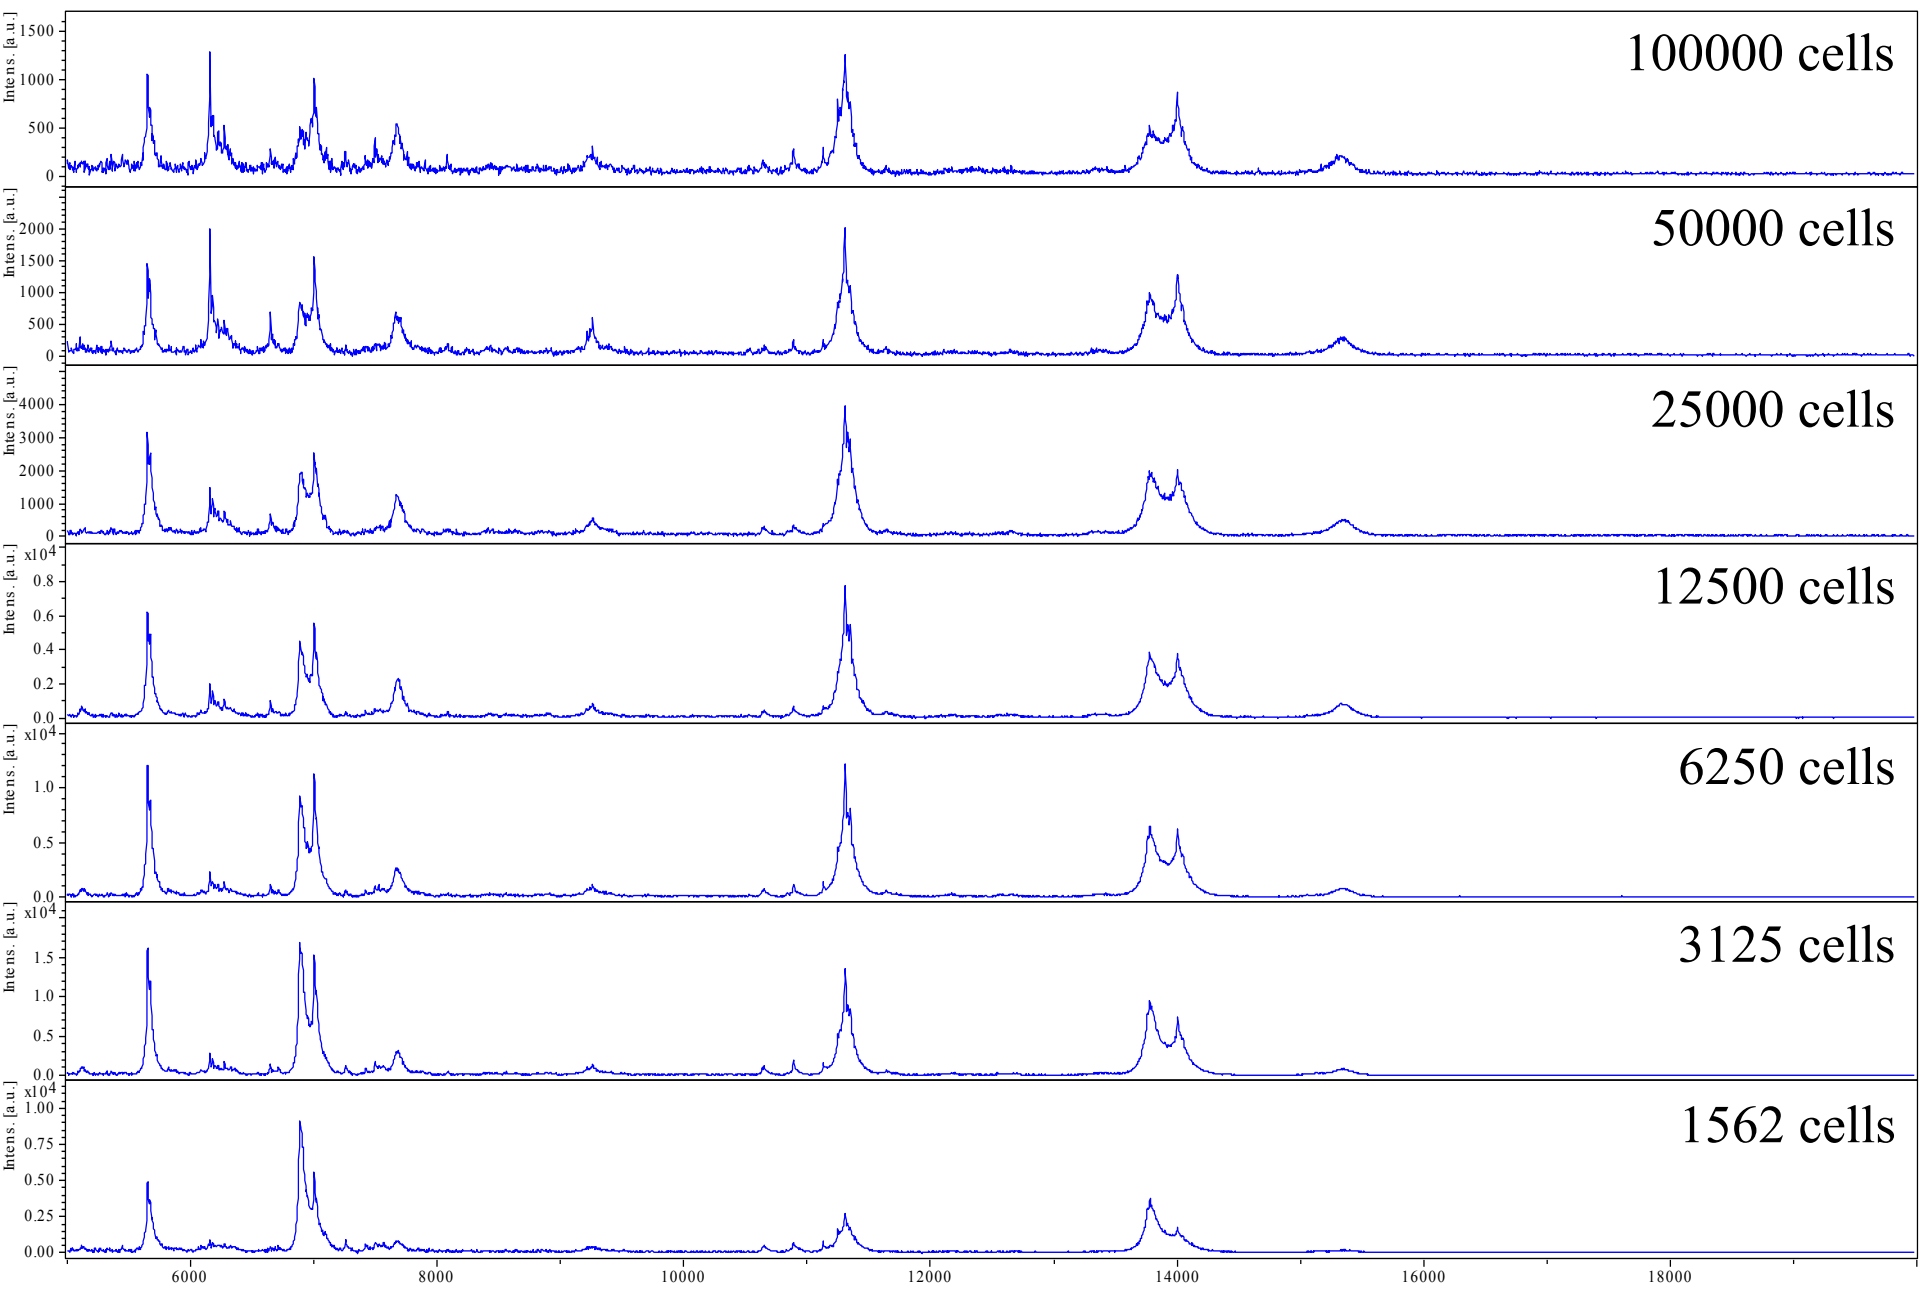

# S1E OKT3/CD28 T cell blast pattern

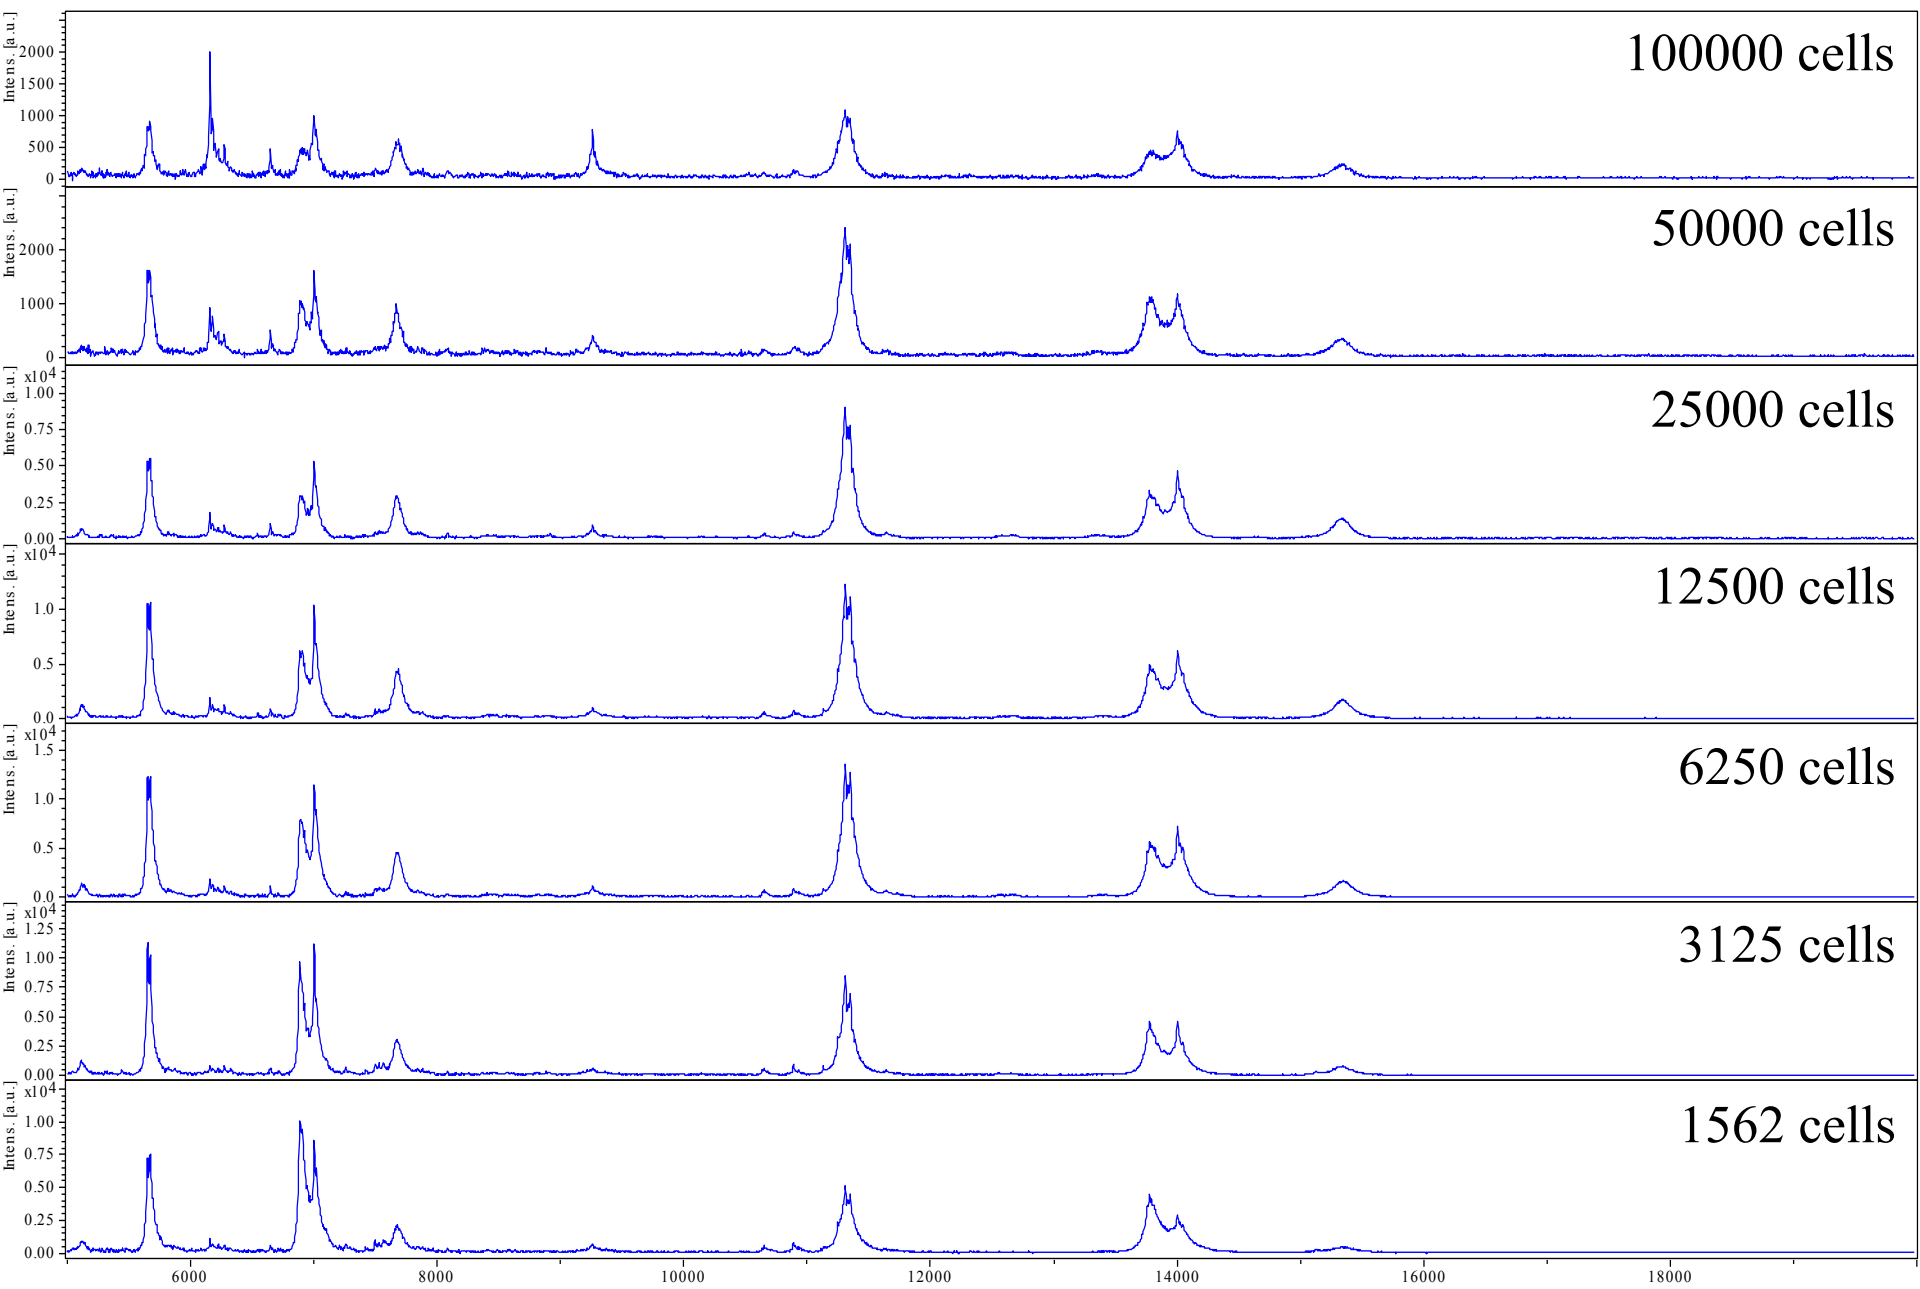

# S1F FHs74Int cell pattern

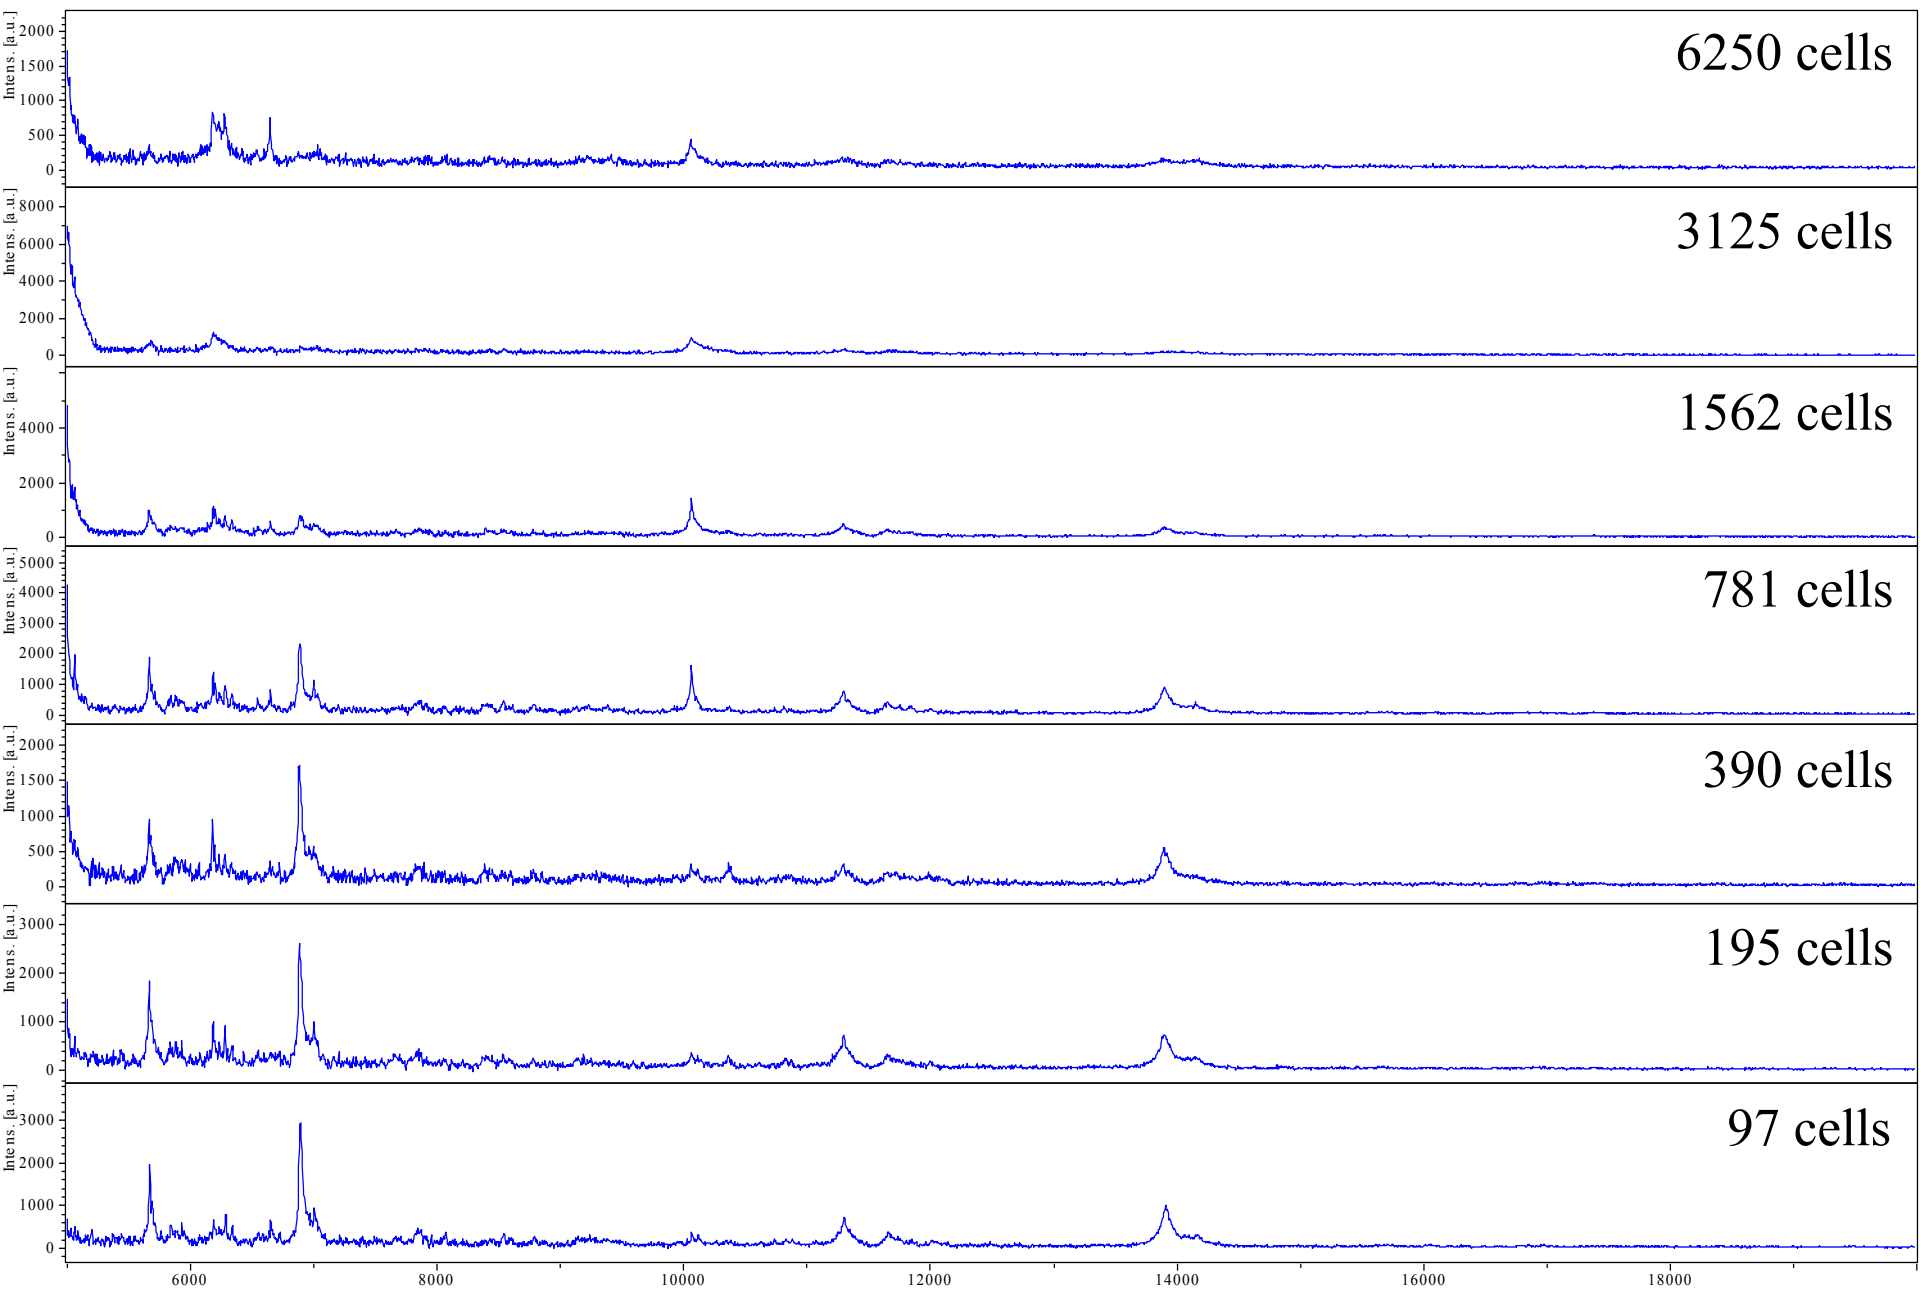

# S1G Plasma pattern

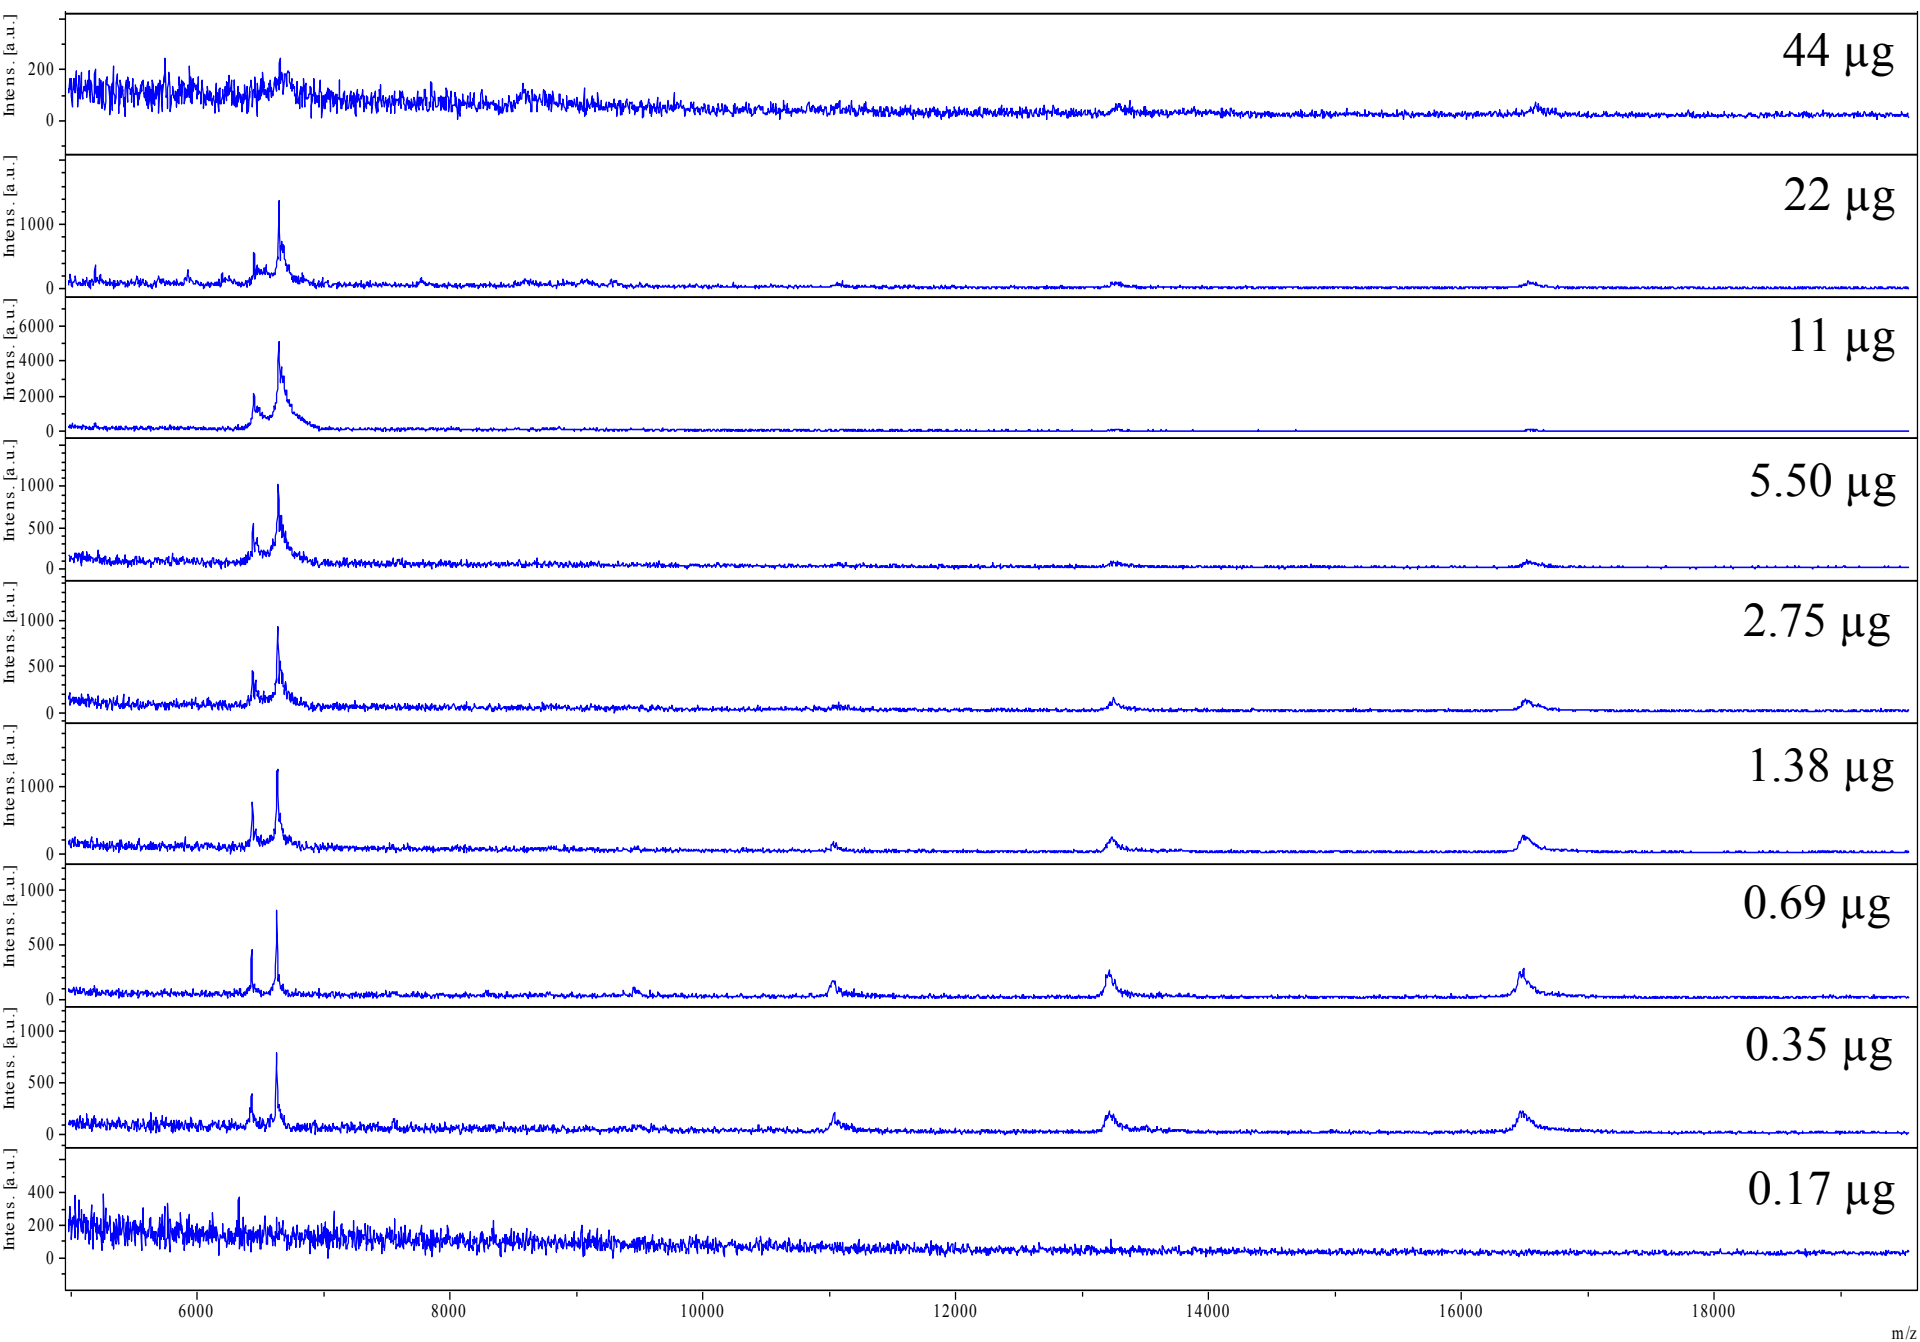

# S1H Jurkat cell pattern

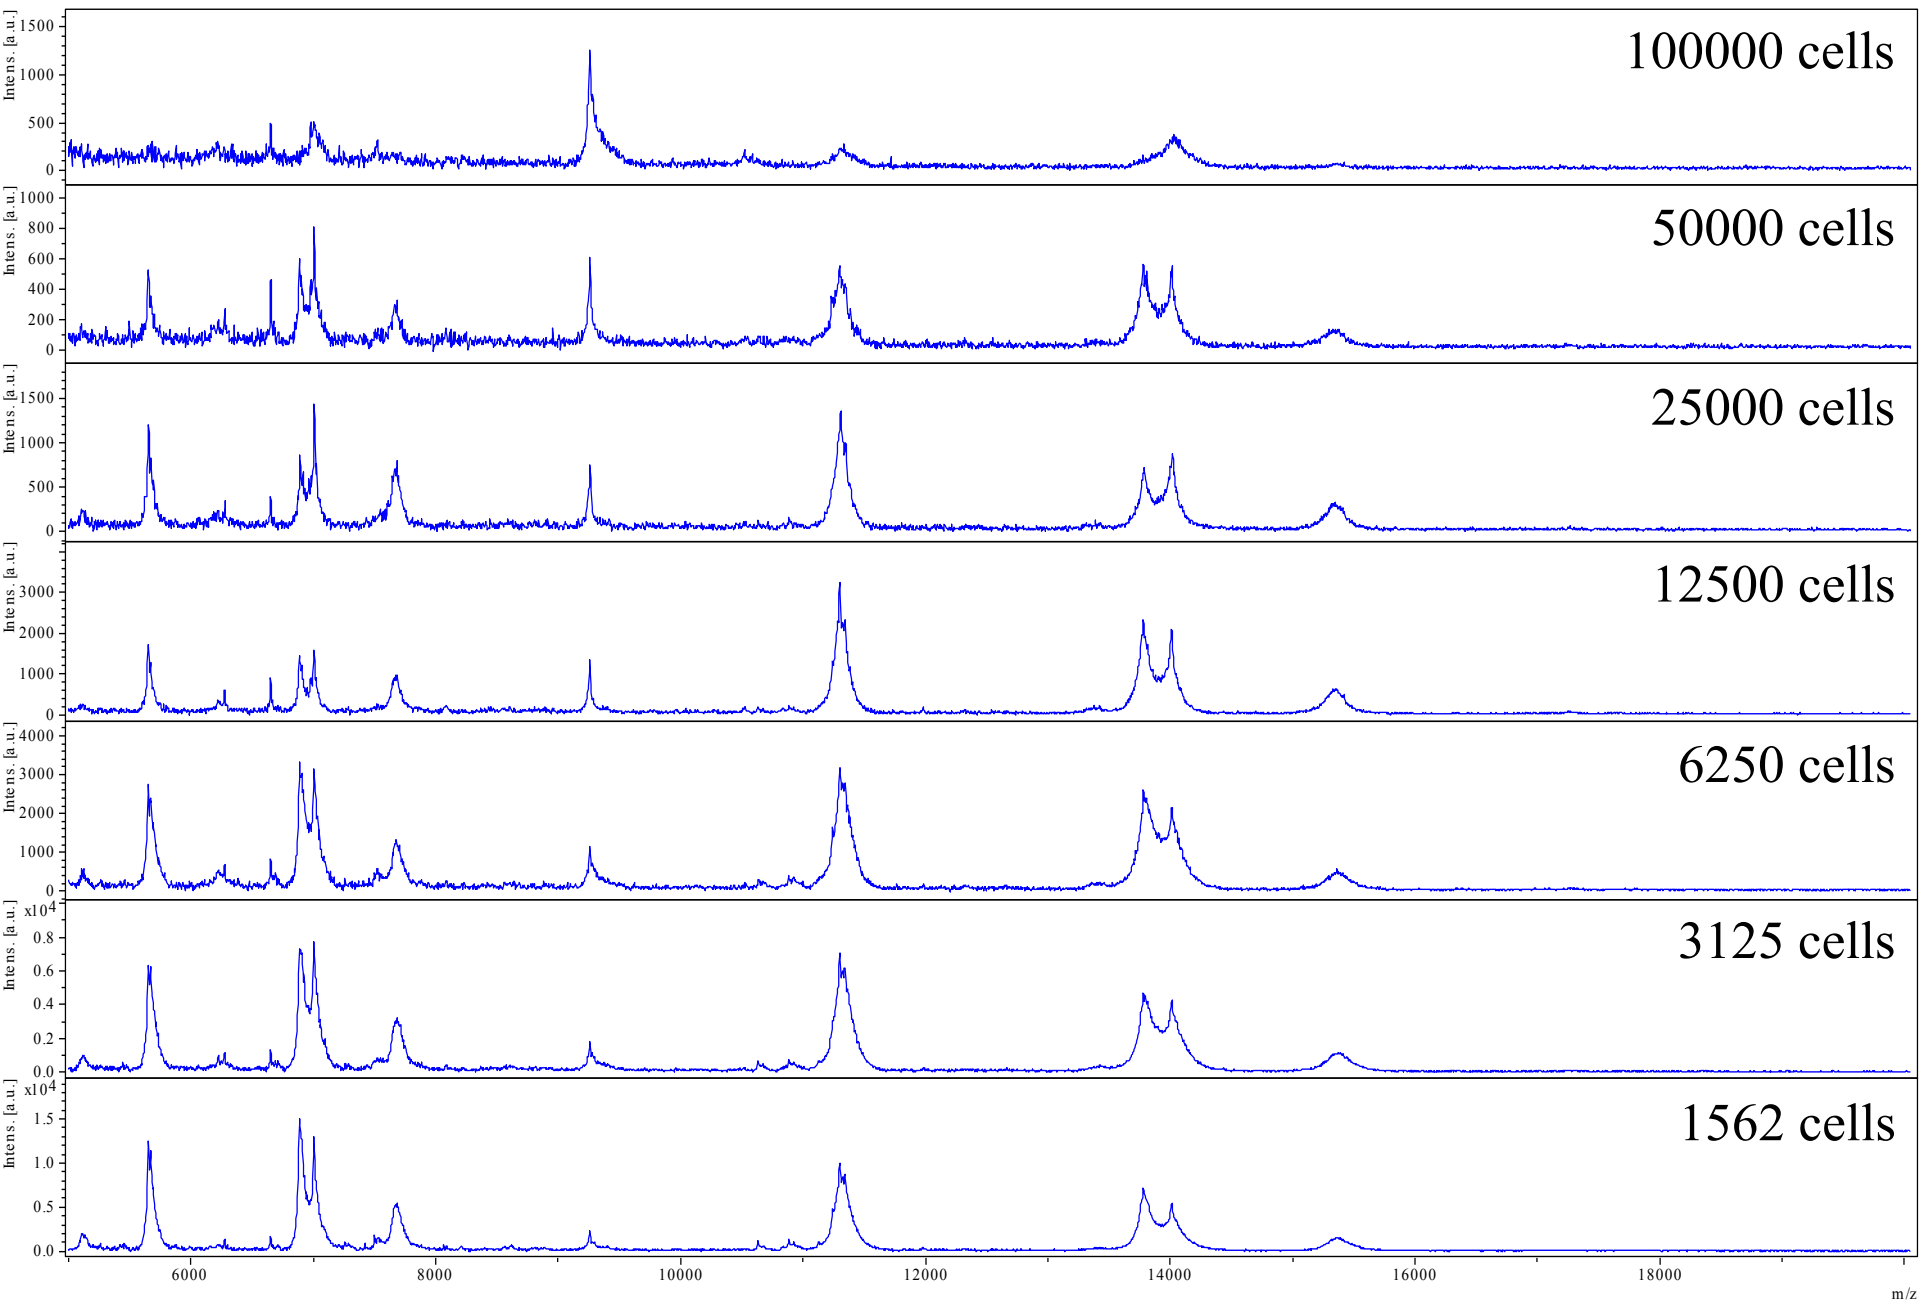



S11

# SK-N-SH cell pattern

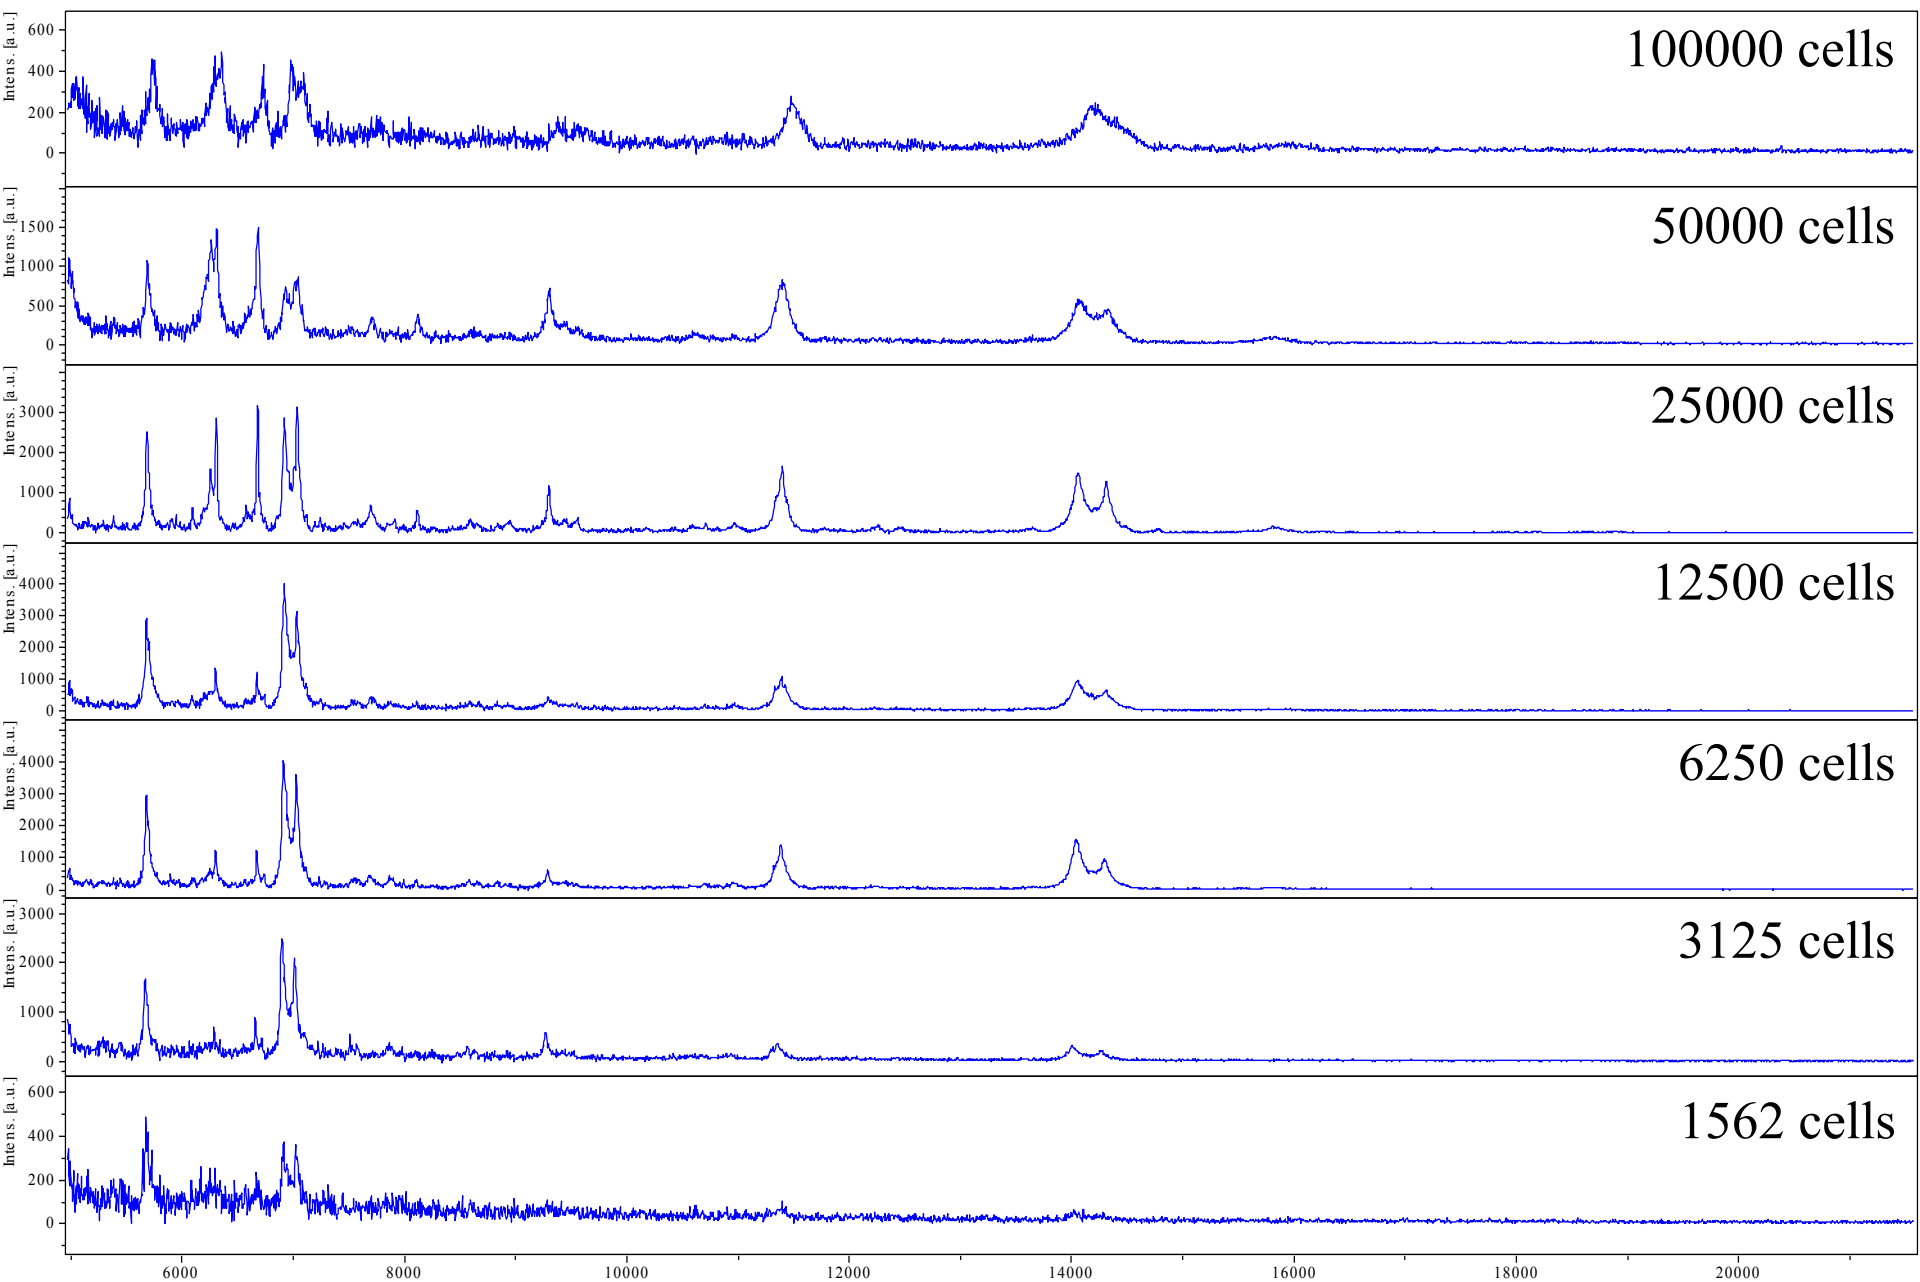

# S1J SH-SY5Y cell pattern

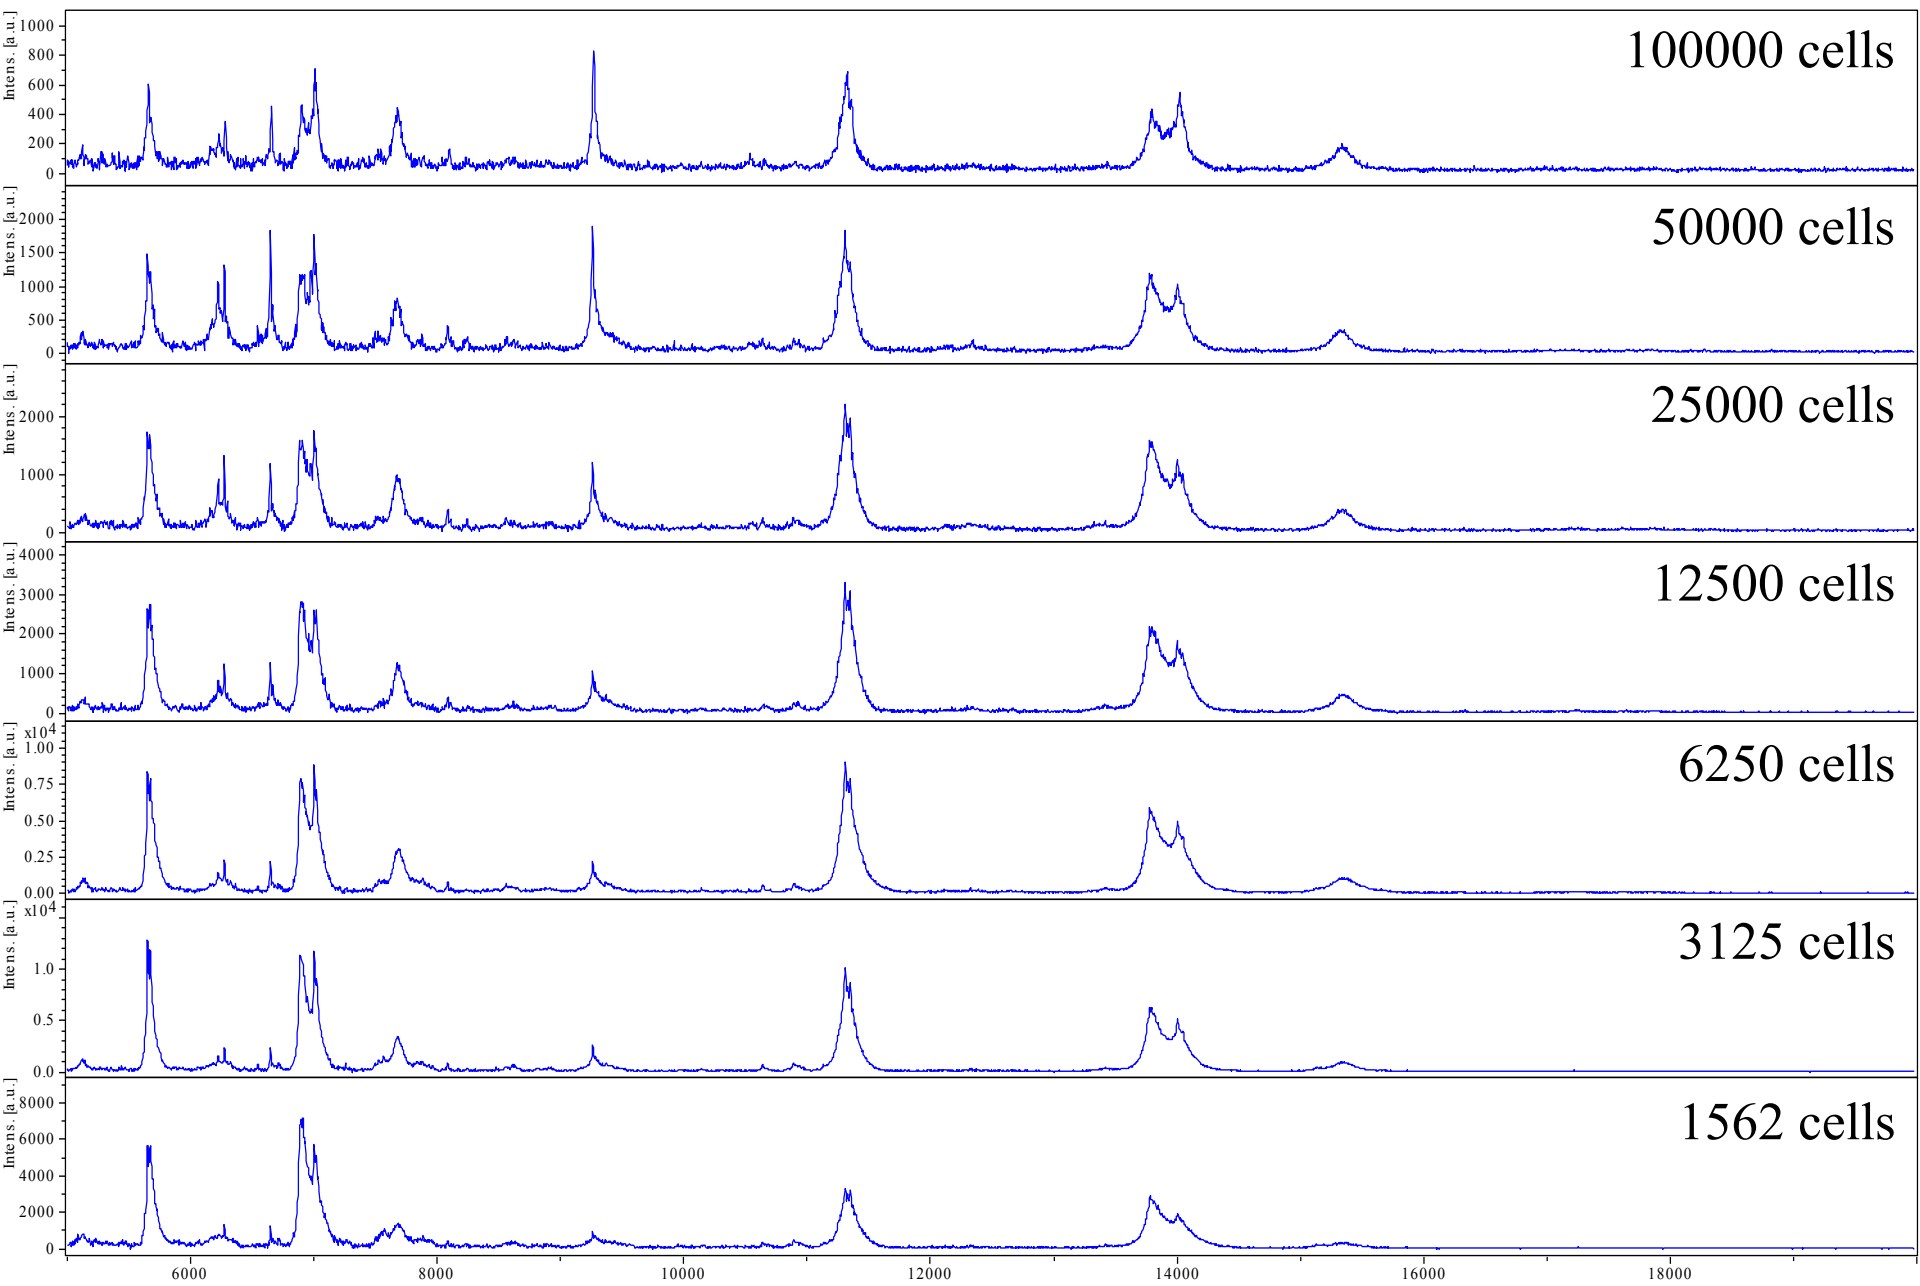

# S1K A549 cell pattern

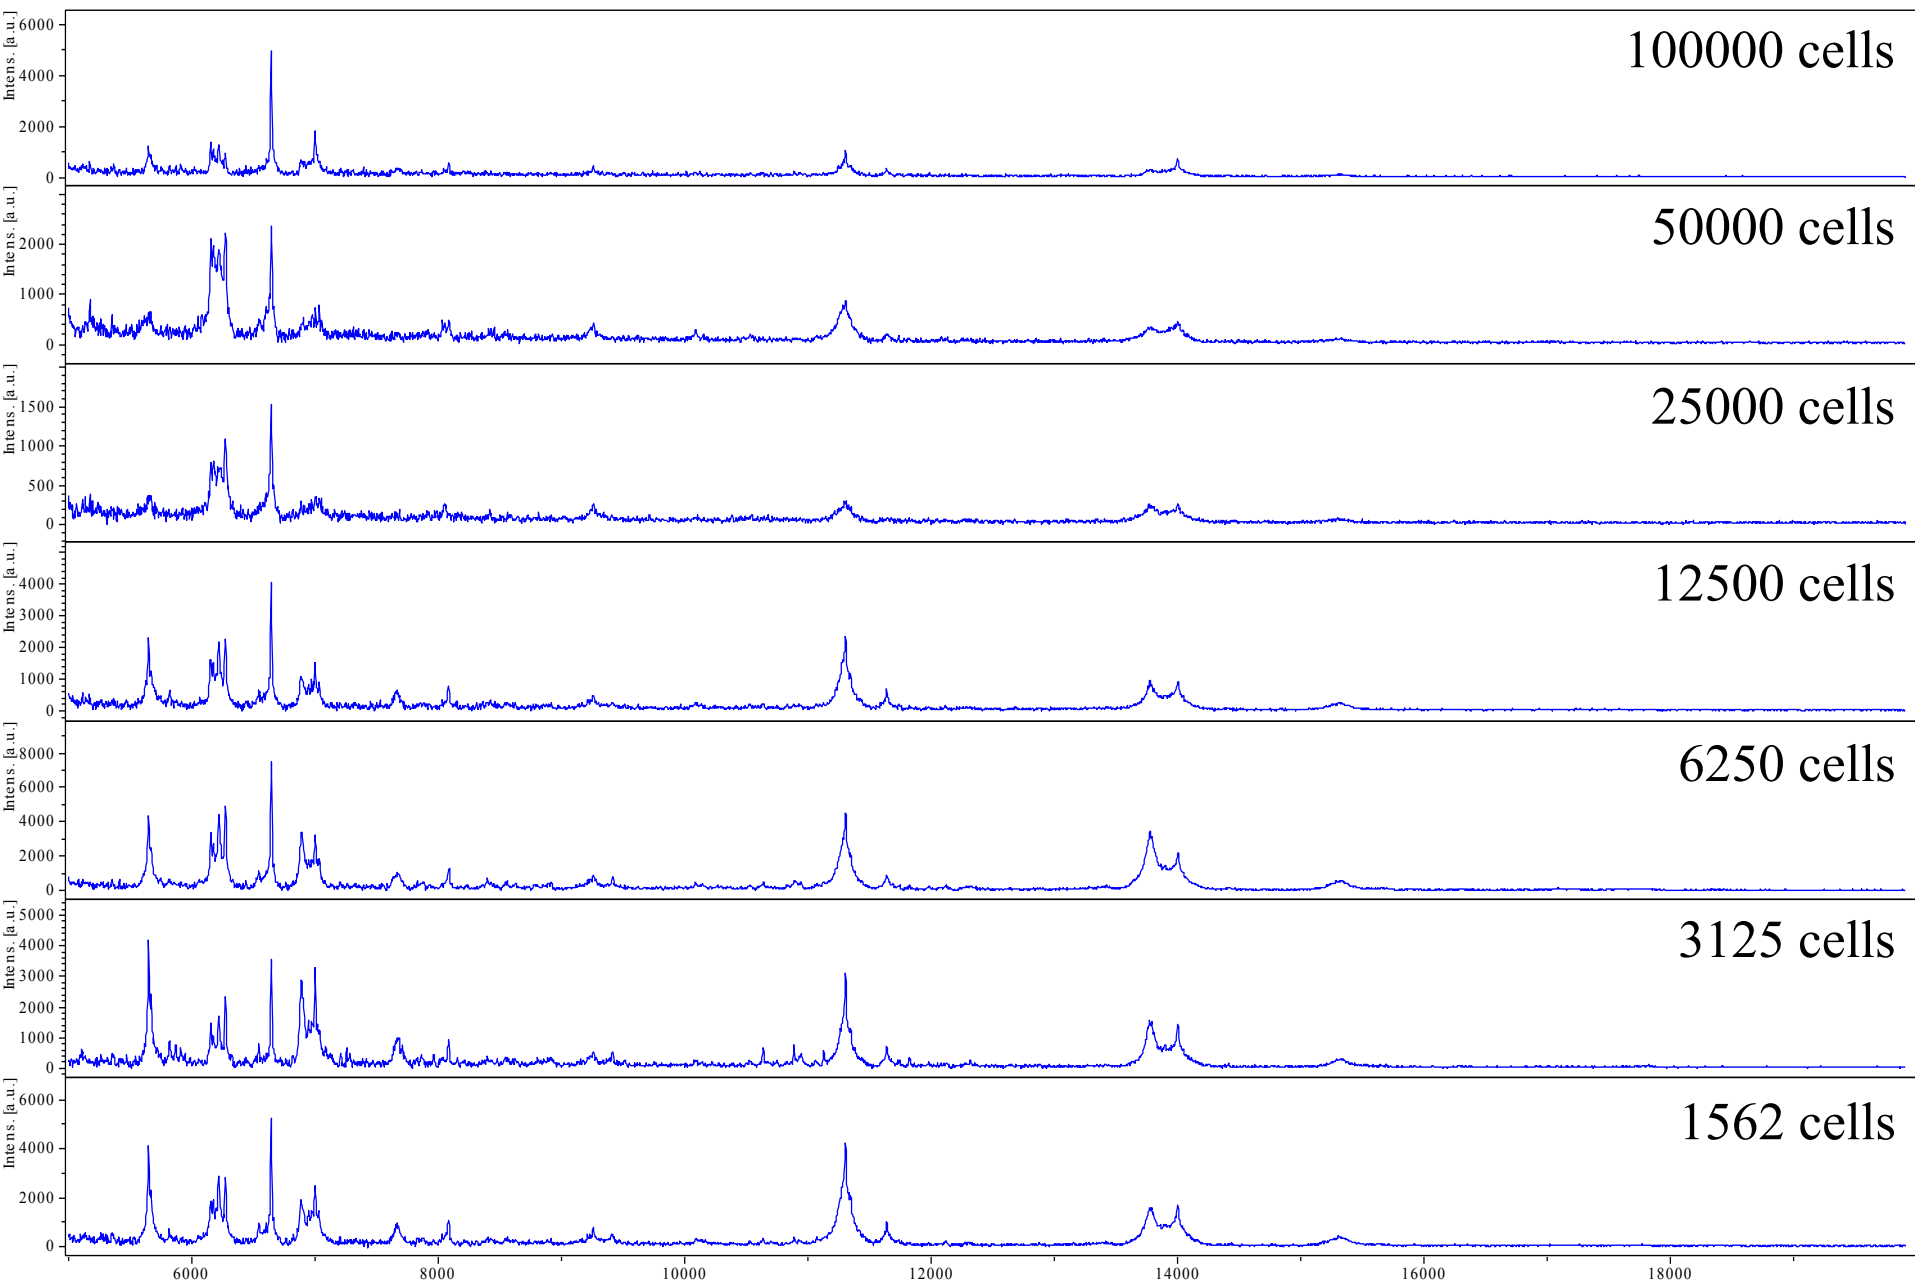

# S1L A2780 cell pattern

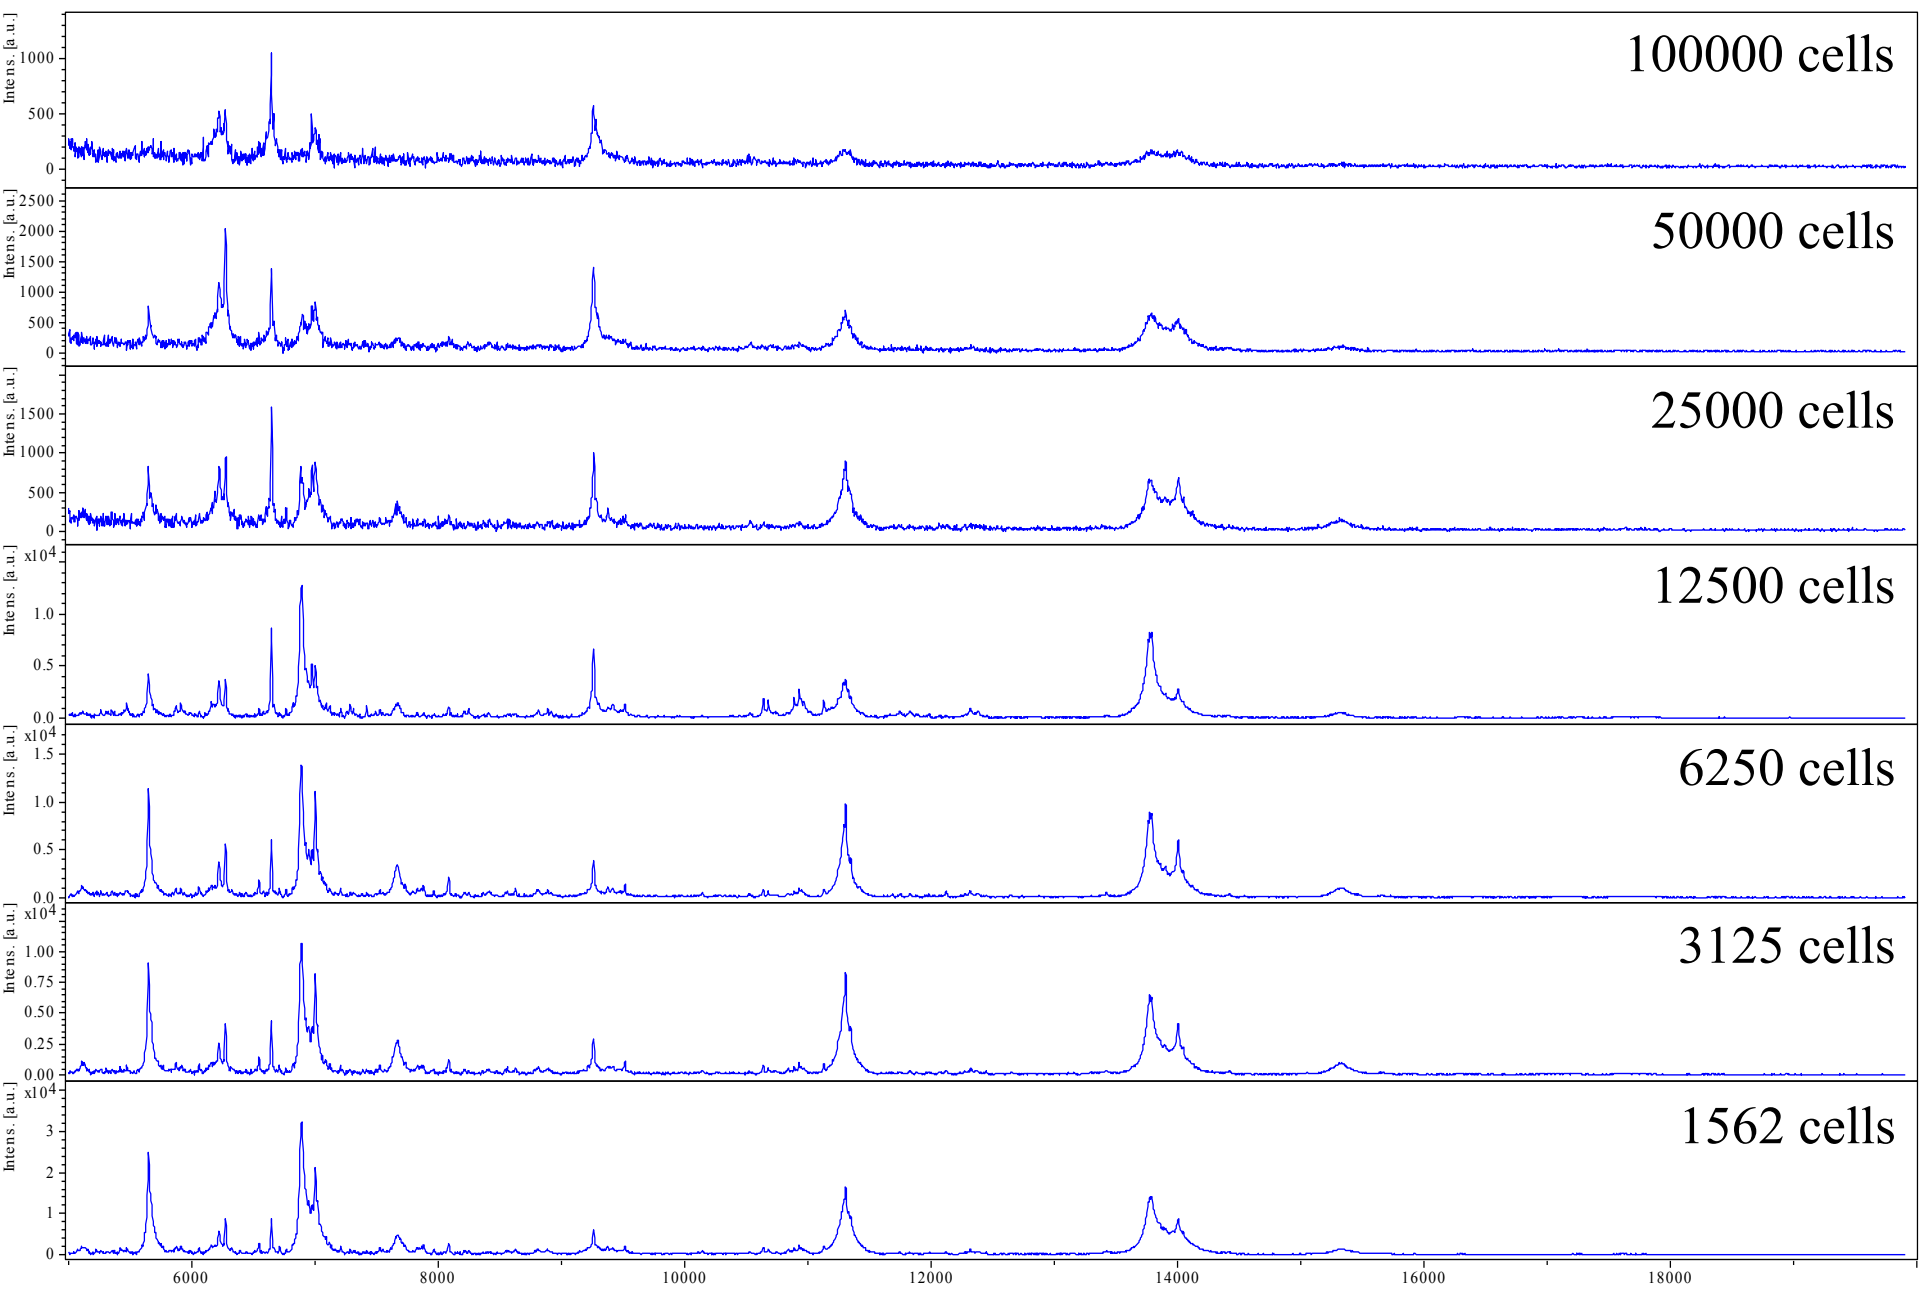

# S1M LNCaP cell pattern

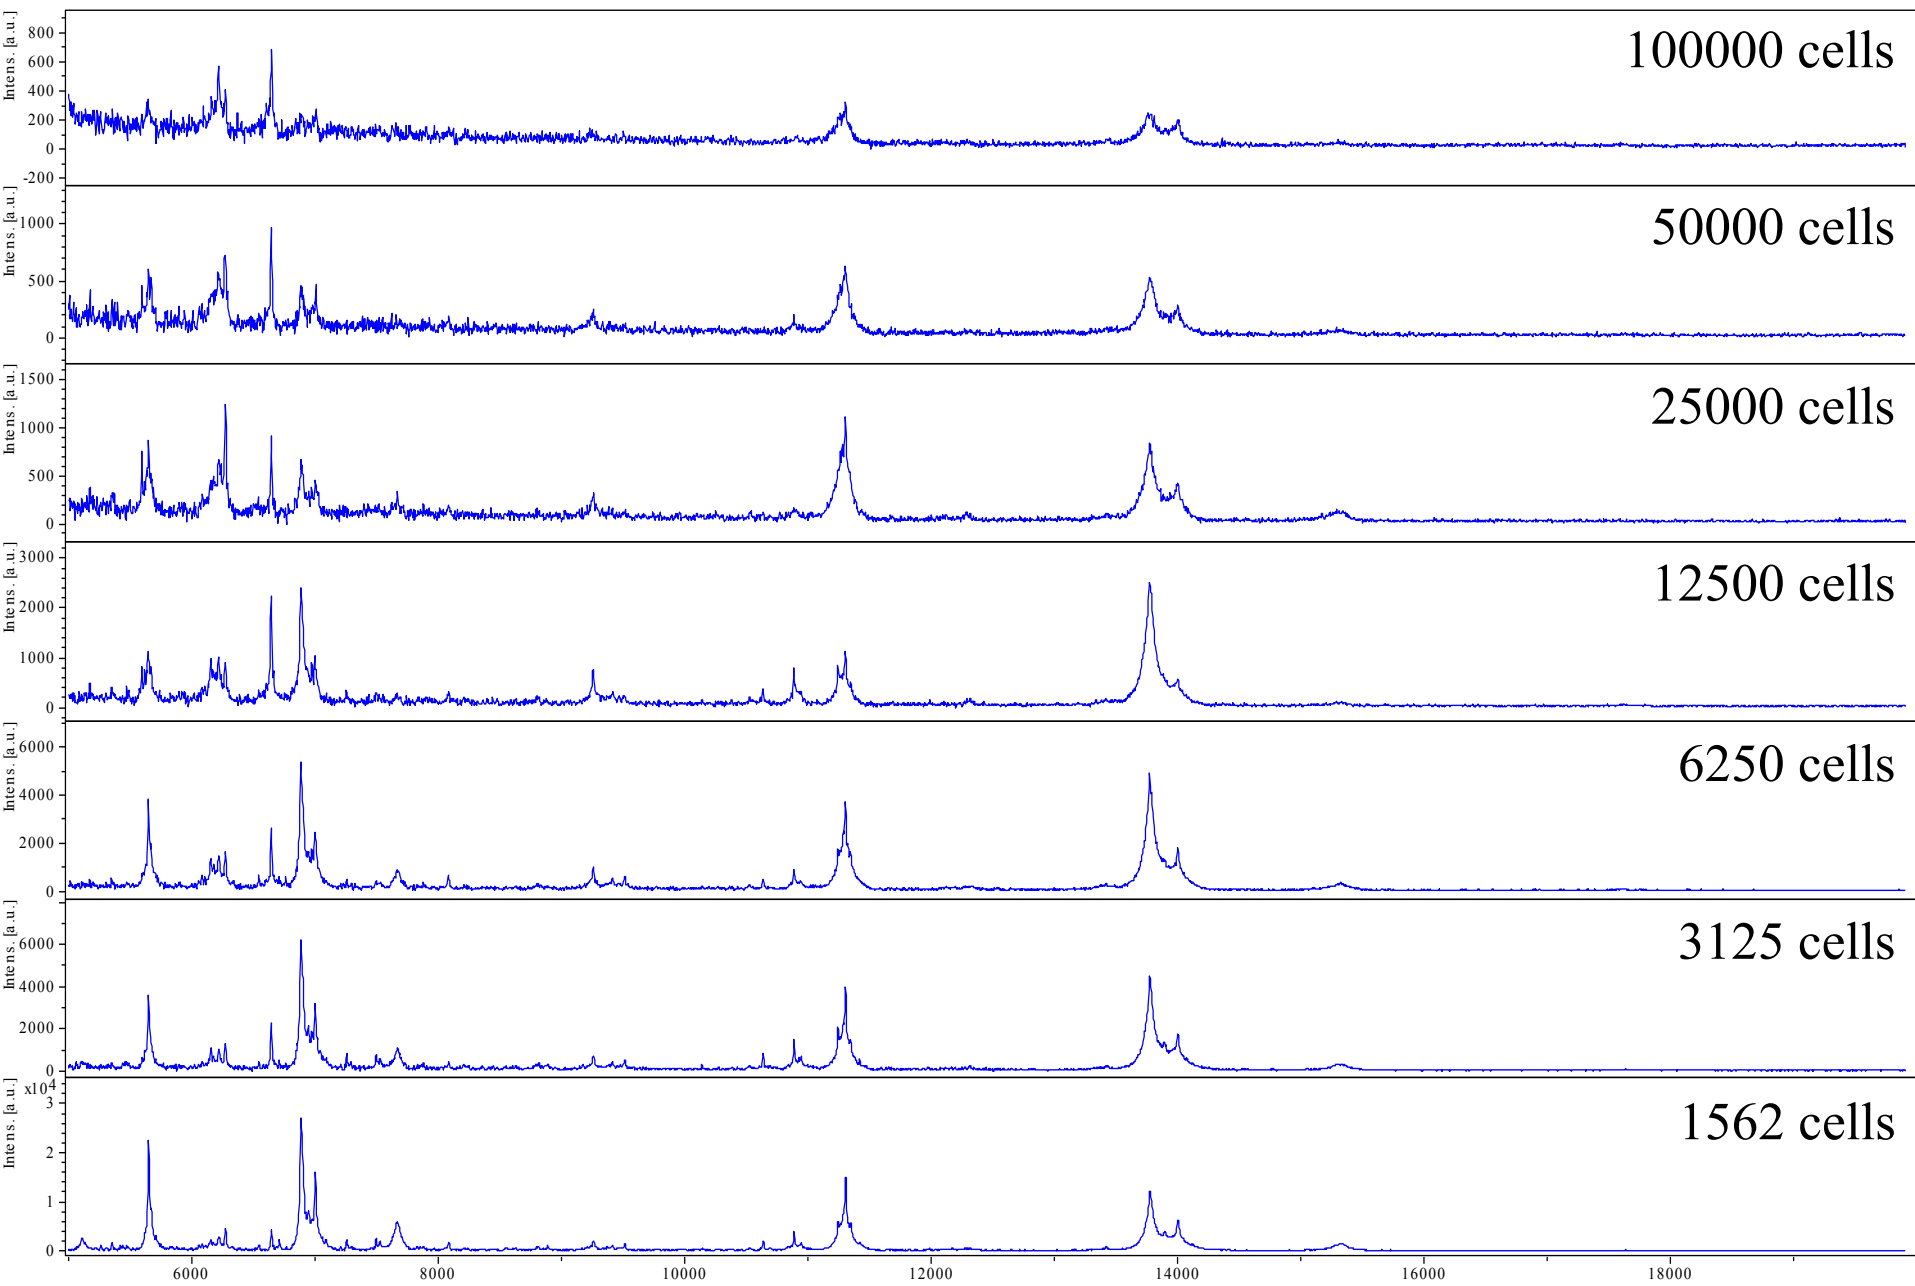

# S1N

## Caco-2 cell pattern

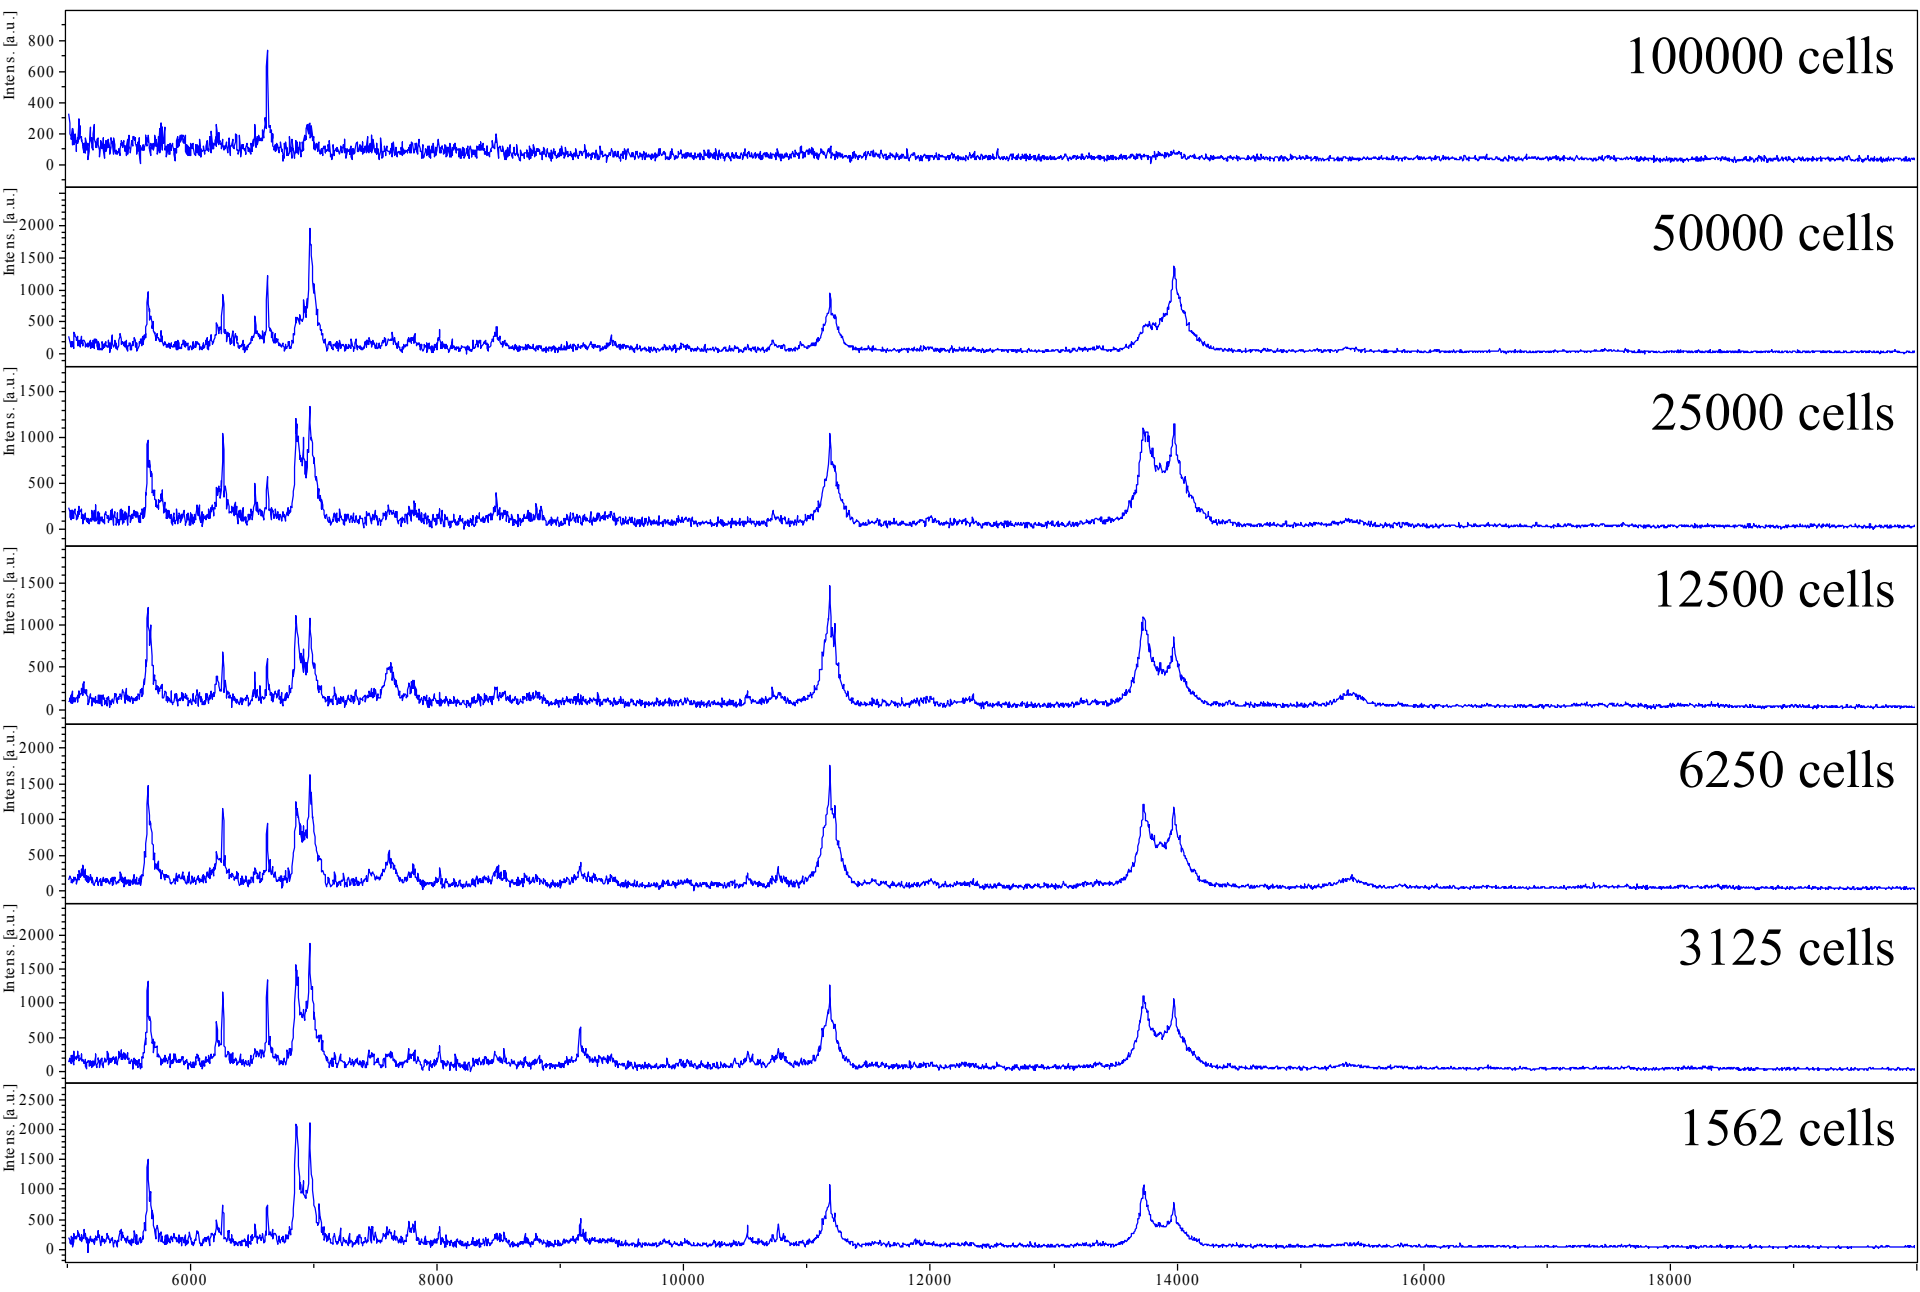

Supplement: Supplementary file 1 [file supplementary]
