# Supplementary material for: Cell-Main Spectra Profile Screening Technique in Simulation of Circulating Tumour Cells Using MALDI-TOF Mass Spectrometry
Source: Preprints.org preprint supplement (doi:10.20944/preprints202106.0506.v1), 2021-06-21
Supplement: Supplementary file 1 [file supplementary]

Table S1. Culture medium for human cell lines in this study.

| **Name** | **Tissue** | **Disease** | **Culture medium** |
| --- | --- | --- | --- |
| FHs74Int  A2780  A549  Caco-2  Jurkat  LNCaP  SK-N-SH  SH-SY5Y | Small intestine  Ovary  Lung  Colon  Peripheral blood  Prostate  Brain  Bone barrow | Normal  Carcinoma  Carcinoma  Colorectal adenocarcinoma  Acute T cell leukemia  Carcinoma  Neuroblastoma  Neuroblastoma | Hybri-Care Medium ATCC 46-X+90% of 30 ng/ml EGF+10%FBS  RPMI-1640+2 mM L-glutamine+10% FBS+1X Penicillin/Streptomycin  DMEM/HAM’S F-12+2 mM L-glutamine+10% FBS+1X Penicillin/Streptomycin  DMEM+2 mM L-glutamine+10% FBS+1X Penicillin/Streptomycin  RPMI-1640+2 mM L-glutamine+10% FBS+1X Penicillin/Streptomycin  RPMI-1640+2 mM L-glutamine+10% FBS+1X Penicillin/Streptomycin  DMEM (1g/L glucose)+2 mM L-glutamine+10% FBS+1X Penicillin/Streptomycin  DMEM (4.5g/L glucose)+2 mM L-glutamine+10% FBS+1X Penicillin/Streptomycin |

Table S2. The mass-to-charge (m/z), intensity, and frequency of main spectrum peaks of normal and cancer cell conditions.

|  | **Normal** | | **Cancer** | | | |
| --- | --- | --- | --- | --- | --- | --- |
| **m/z** | **Intensity** | **Frequency** | | **Intensity** | **Frequency** |
| 5043.18 | 15.46 | 71.7 | |  |  |
| 5075.46 | 14.15 | 66.9 | |  |  |
| 5093.74 | 11.08 | 54.6 | |  |  |
| 5114.2 | 10.49 | 63.3 | |  |  |
| 5145.94 | 9.33 | 49 | | 10.6 | 60.8 |
| 5173.37 |  |  | | 10.72 | 47.6 |
| 5183.48 | 19.18 | 71.3 | |  |  |
| 5206.91 | 12.32 | 62.9 | |  |  |
| 5225.35 | 11.45 | 48.6 | | 10.11 | 55.4 |
| 5259.13 | 11.02 | 45.8 | |  |  |
| 5313.19 | 10.63 | 52.2 | |  |  |
| 5355.09 | 13.97 | 67.7 | | 12.9 | 83.7 |
| 5376.39 | 11.86 | 66.9 | |  |  |
| 5415.29 | 13.94 | 57.4 | |  |  |
| 5421.98 |  |  | | 13.31 | 69.9 |
| 5472.78 | 10.26 | 49.4 | |  |  |
| 5585.21 | 9.91 | 45.4 | |  |  |
| 5603.39 | 11.23 | 45.4 | | 9.02 | 51.8 |
| 5618.3 | 13.43 | 60.2 | |  |  |
| 5636.54 | 19.77 | 49 | | 16.33 | 92.2 |
| 5653.22 | 57.01 | 83.7 | | 65.01 | 92.8 |
| 5674.85 | 37.47 | 86.1 | | 34.95 | 100 |
| 5691.52 | 26.22 | 70.5 | | 17.11 | 89.2 |
| 5707.47 |  |  | | 12.51 | 72.3 |
| 5720.72 | 18.07 | 69.3 | | 10.27 | 60.2 |
| 5737.01 | 14.52 | 58.2 | |  |  |
| 5755.91 | 11.04 | 49.4 | |  |  |
| 5783.34 | 10.15 | 43.4 | |  |  |
| 5810.49 | 12.79 | 50.6 | |  |  |
| 5830.47 | 13.07 | 72.1 | |  |  |
| 5921.75 | 13.01 | 69.3 | |  |  |
| 5992.05 |  |  | | 9.26 | 60.8 |
| 6061.32 | 11.22 | 47 | | 8.95 | 51.8 |
| 6159.65 | 15.64 | 86.1 | | 12.11 | 58.4 |
| 6177.59 | 27.36 | 67.3 | | 20.15 | 67.5 |
| 6195.73 | 16.91 | 75.3 | |  |  |
| 6226.3 | 24.86 | 76.9 | | 17.08 | 90.4 |
| 6244.58 |  |  | | 15.69 | 62 |
| 6261.99 |  |  | | 22.16 | 57.2 |
| 6276.44 | 39.69 | 78.9 | | 34.68 | 83.7 |
| 6293.13 |  |  | | 12.33 | 74.7 |
| 6298.54 | 15.63 | 58.2 | |  |  |
| 6330.95 | 12.58 | 53.4 | | 20.87 | 66.9 |
| 6358.1 |  |  | | 26.87 | 56 |
| 6364.12 | 11.38 | 54.6 | |  |  |
| 6383.02 |  |  | | 18.26 | 49.4 |
| 6512.09 | 11.56 | 46.2 | | 14.75 | 48.2 |
| 6545.47 | 18.08 | 58.6 | | 12.26 | 86.1 |
| 6567.28 | 12.2 | 49.4 | |  |  |
| 6591.88 | 11.24 | 48.6 | |  |  |
| 6628.67 | 23.19 | 45.4 | |  |  |
| 6641.78 |  |  | | 22.63 | 67.5 |
| 6647.14 | 38.25 | 77.3 | | 57.72 | 51.8 |
| 6670.24 | 20.03 | 65.7 | | 15.07 | 81.9 |
| 6692.58 | 12.44 | 59.4 | | 9.99 | 57.2 |
| 6713.84 |  |  | | 8.7 | 75.3 |
| 6728.11 | 13.14 | 44.6 | |  |  |
| 6889.69 | 30.06 | 80.1 | | 51.51 | 95.2 |
| 6910.13 | 21.26 | 72.5 | | 34.41 | 84.5 |
| 6926.03 | 24.62 | 50.6 | | 21.12 | 71.1 |
| 6950.18 | 13.67 | 58.2 | | 17.67 | 89.8 |
| 6976.7 | 13.53 | 45.8 | |  |  |
| 6980.44 |  |  | | 20.78 | 95.8 |
| 7007.11 | 25.35 | 72.9 | | 62.86 | 98.2 |
| 7021.48 |  |  | | 33.05 | 95.2 |
| 7036.64 | 19.17 | 69.7 | | 21.16 | 77.7 |
| 7057.62 | 12.95 | 51.8 | | 12.41 | 48.2 |
| 7080.54 | 11.49 | 45.8 | |  |  |
| 7258.59 |  |  | | 8.56 | 56.6 |
| 7527.42 |  |  | | 7.09 | 51.8 |
| 7558.62 | 24.99 | 50.6 | |  |  |
| 7624.56 |  |  | | 8.18 | 47 |
| 7637.38 | 11.22 | 48.2 | |  |  |
| 7647.25 |  |  | | 10.72 | 63.3 |
| 7659.63 | 10.88 | 54.6 | |  |  |
| 7668.73 |  |  | | 15.43 | 48.8 |
| 7678.22 | 11.73 | 49.4 | | 13.68 | 75.9 |
| 7703.24 | 10.42 | 48.6 | |  |  |
| 7709.9 |  |  | | 8.82 | 49.4 |
| 7835.01 | 10.24 | 55 | |  |  |
| 7882.78 | 12.27 | 61 | | 8.35 | 59 |
| 7930.28 | 10.68 | 45.8 | |  |  |
| 8087.14 | 17.18 | 54.6 | | 12.24 | 68.7 |
| 8558.19 |  |  | | 17.45 | 69.3 |
| 8583.8 |  |  | | 13.68 | 47.6 |
| 9263.08 |  |  | | 28.25 | 57.8 |
| 10844.09 |  |  | | 12.01 | 55.4 |
| 10877.55 |  |  | | 7.37 | 54.2 |
| 11247.02 |  |  | | 15.47 | 66.9 |
| 11268.14 | 19.6 | 55.4 | | 19.31 | 87.3 |
| 11289.64 | 25.21 | 71.3 | |  |  |
| 11307.18 | 44.01 | 61.4 | | 42.46 | 93.4 |
| 11328.46 | 29 | 59.8 | | 25.44 | 59.6 |
| 11348.59 | 27.72 | 66.1 | | 27.14 | 78.9 |
| 11366.75 |  |  | | 16.37 | 47.6 |
| 11371.86 | 22.84 | 53.4 | |  |  |
| 11383.36 |  |  | | 11.76 | 72.9 |
| 13744.32 |  |  | | 18.58 | 61.4 |
| 13783.64 |  |  | | 28.72 | 93.4 |
| 13788.19 |  |  | | 28.63 | 66.9 |
| 13817.97 |  |  | | 19.32 | 68.7 |
| 13852.6 |  |  | | 13.67 | 53.6 |
| 13908.11 |  |  | | 9.88 | 56 |
| 13988.19 |  |  | | 23.46 | 80.7 |
| 14014.15 |  |  | | 30.39 | 85.5 |
| 14053.31 |  |  | | 16.18 | 74.1 |
